# Supplementary material for: Supramolecular assemblies in the molecular complexes of 4-cyanophenylboronic acid with different N-donor ligands
Source: Royal Society of Chemistry journal article supplement (doi:10.1039/d3ra03936f), 2023-01-01
Supplement: d3ra03936f1.pdf [file d3ra03936f1.pdf]

*Supporting Information*

**Supramolecular assemblies in the molecular complexes of  
4-cyanophenylboronic acid with different N-donor ligands**

**Samina Easmin,\* and Venkateswara Rao Pedireddi**

*Solid State Supramolecular and Structural Chemistry Laboratory, School of Basic Sciences,  
Indian Institute of Technology Bhubaneswar, Argul, Bhubaneswar 752 050, India.*

Email: [se15@iitbbs.ac.in](mailto:se15@iitbbs.ac.in)

**Table of Contents.**

**S1. ORTEP Drawing for all the Supramolecular Assemblies**

**S2. Packing Arrangement**

**S3. PXRD Patterns**

**S4. Isostructurality and Isomorphism**

**S5. BFDH and Attachment Energy**

**S6. Hirshfeld Surface Analysis**

**S7. Interaction Energy Calculation**

**Table S1. ORTEP Representation for all the Co-crystals, 1 – 7, 6a, 6b, 7a and 7b, with all Non-hydrogen Atoms Thermal Ellipsoids are Shown at the 50 % Probability Level**

| Co-crystals | ORTEP Representation |
|-------------|----------------------|
| 1           |                      |
| 2           |                      |
| 3           |                      |

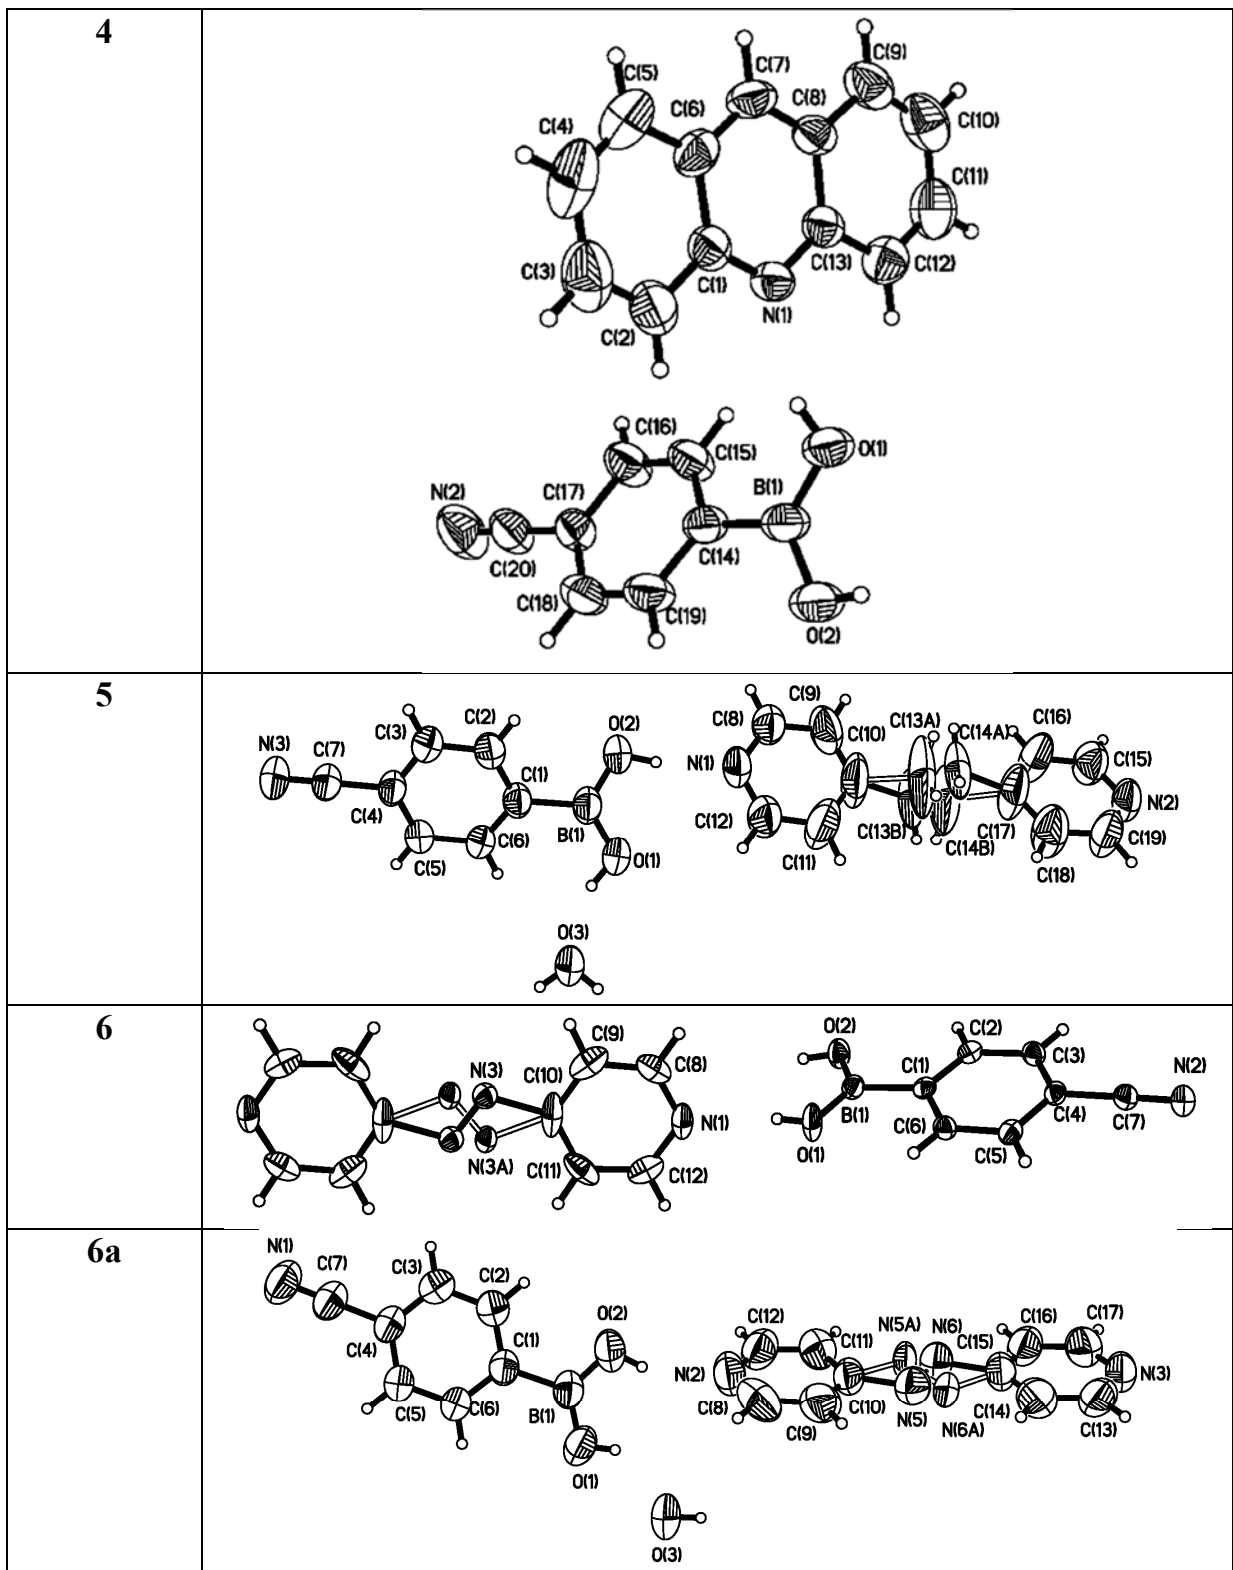

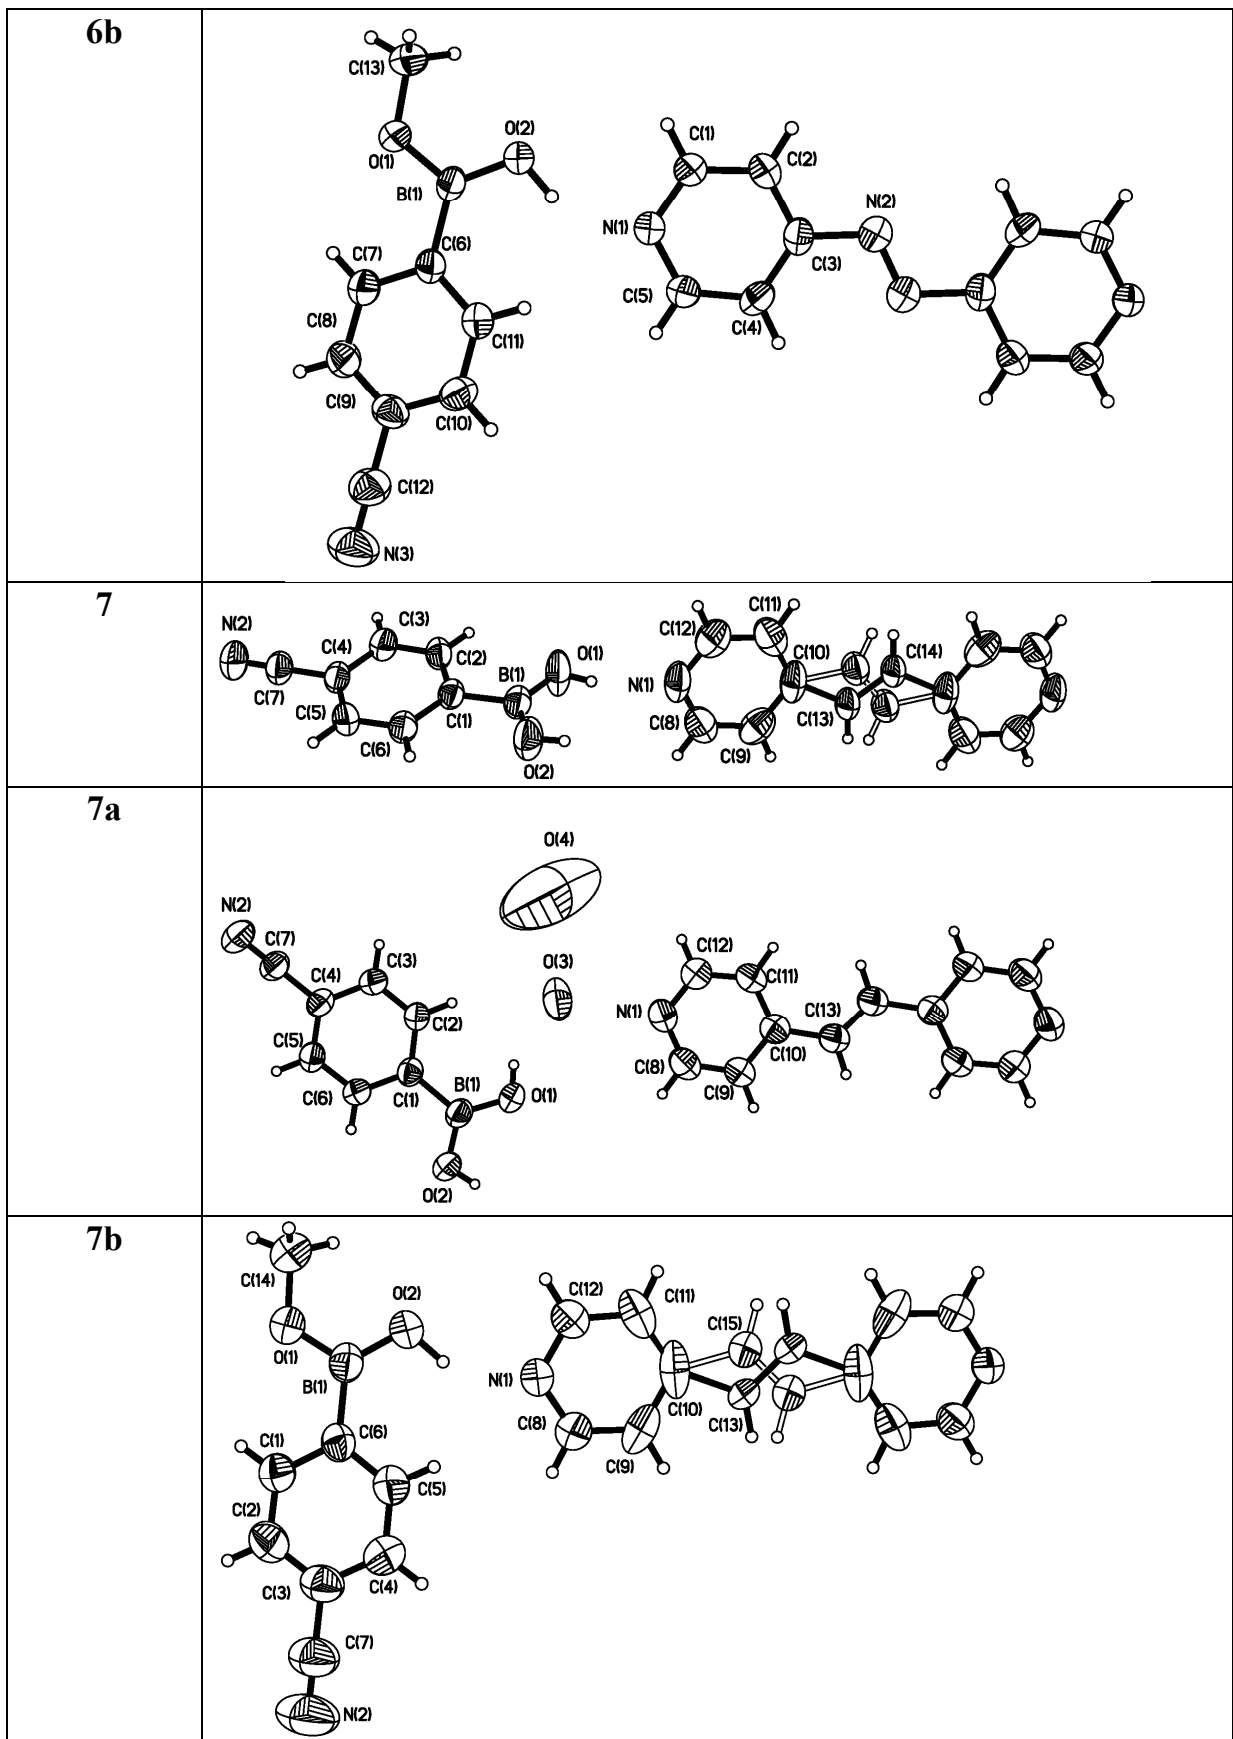

**Scheme S1.** A schematic representation of recognition pattern of 3,5-dinitrobenzamide with some co-formers, yielding a tetramer. (J. PrakashaReddy, V. R. Pedireddi, *Tetrahedron* **2004**, *60*, 8817-8827)

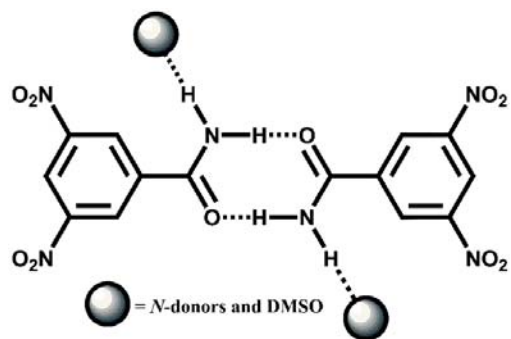

## S2. Packing Arrangements

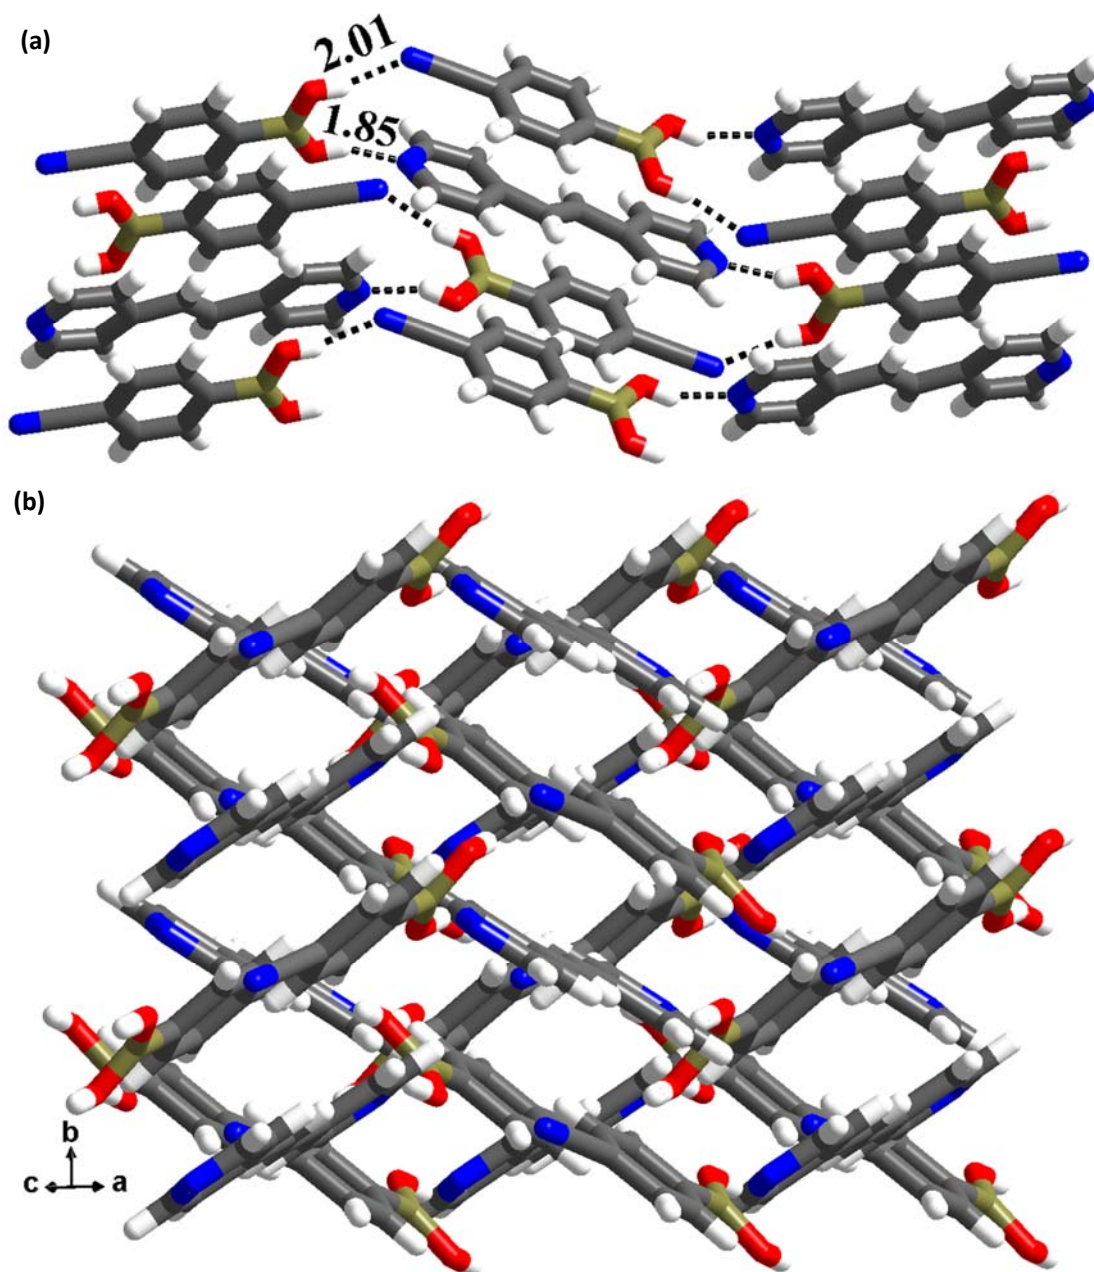

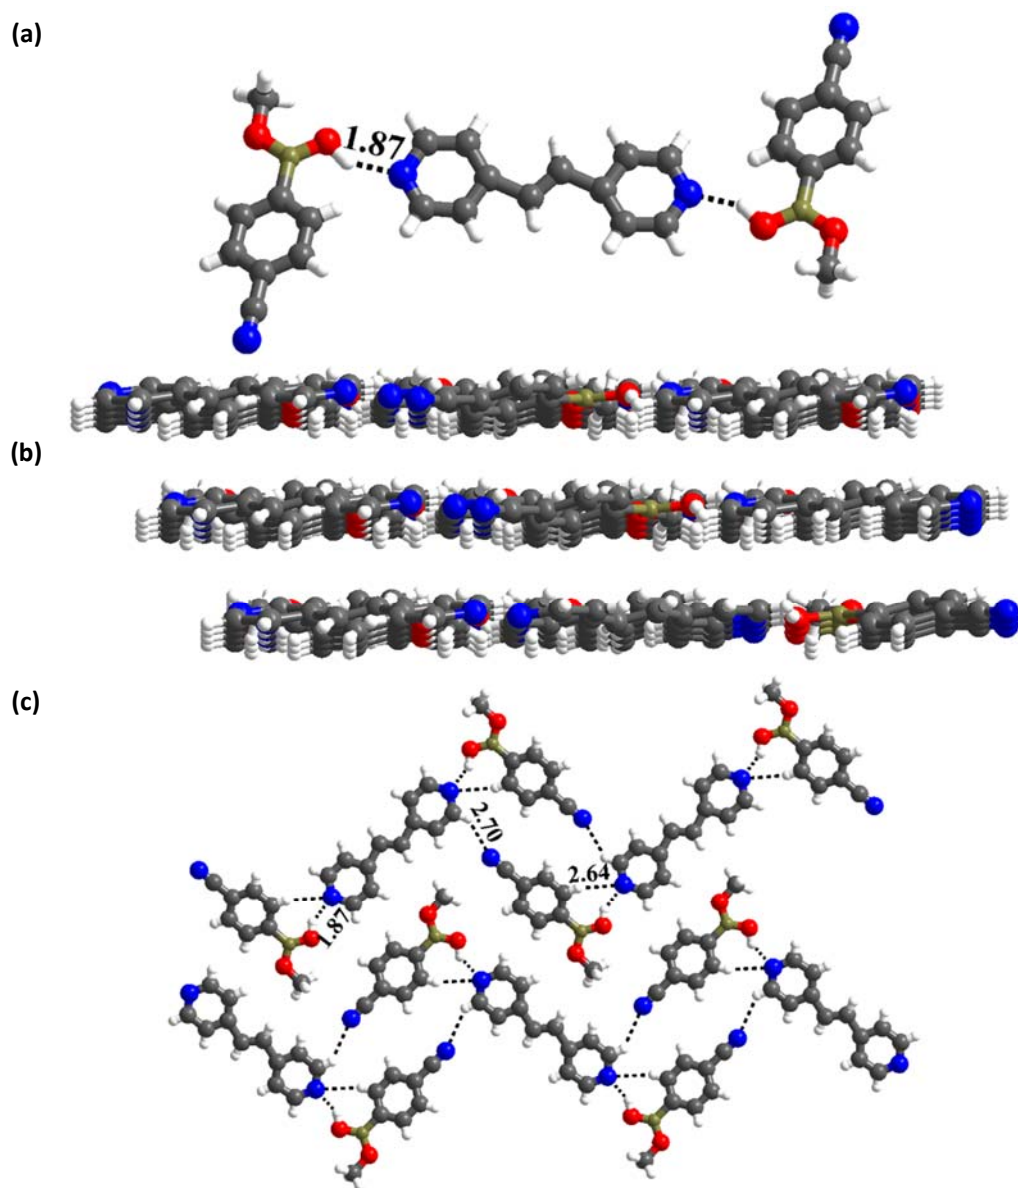

**Figure S2.** (a) Molecular recognition observed in the monoester with *bpyee*. (b) Stacked sheet arrangement found in the molecular complex **7b**. (c) Two-dimensional arrangement of the molecules in the crystal lattice, **7b**.



### S3. PXRD Patterns

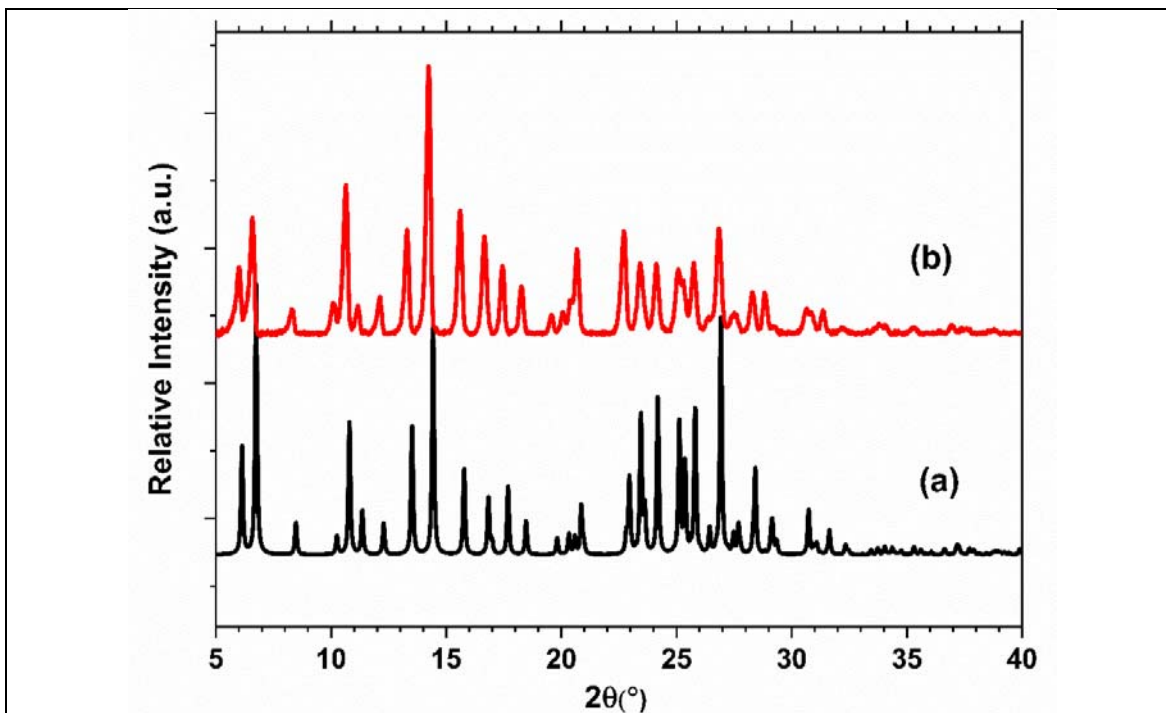

**Figure S2a.** Powder X-ray diffraction patterns of **1** (a) Simulated patterns. (b) Experimental ground co-crystals.

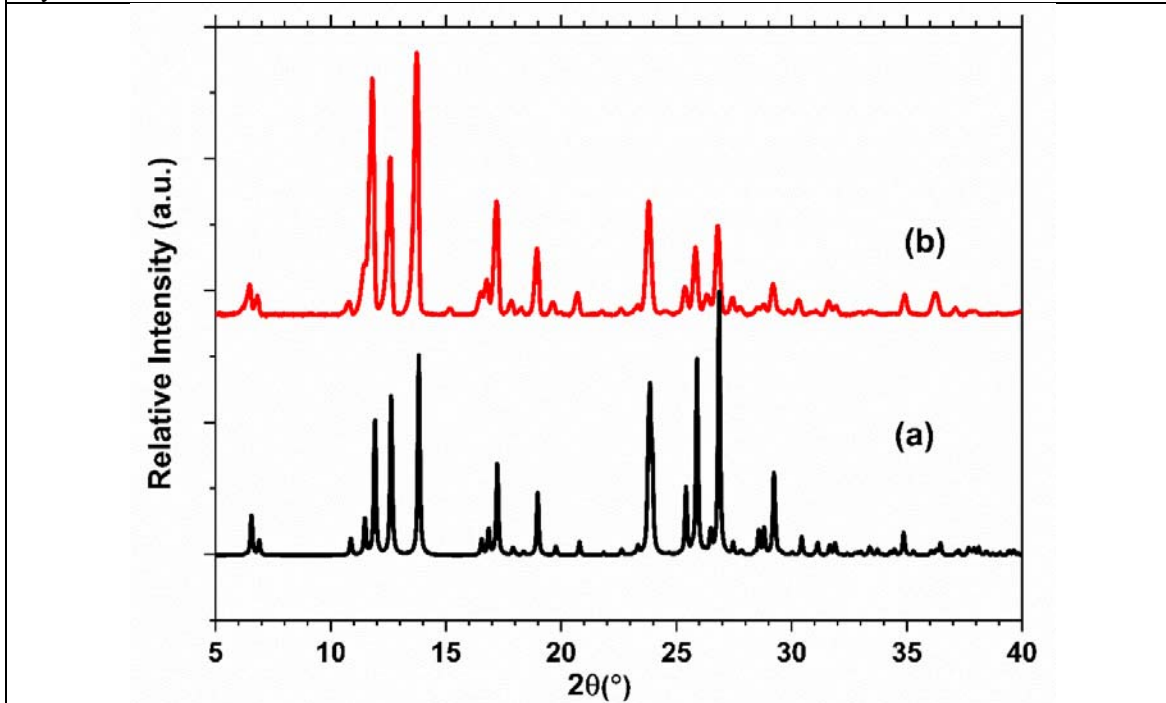

**Figure S2b.** Powder X-ray diffraction patterns of **2** (a) Simulated patterns (b) Experimental ground co-crystals.

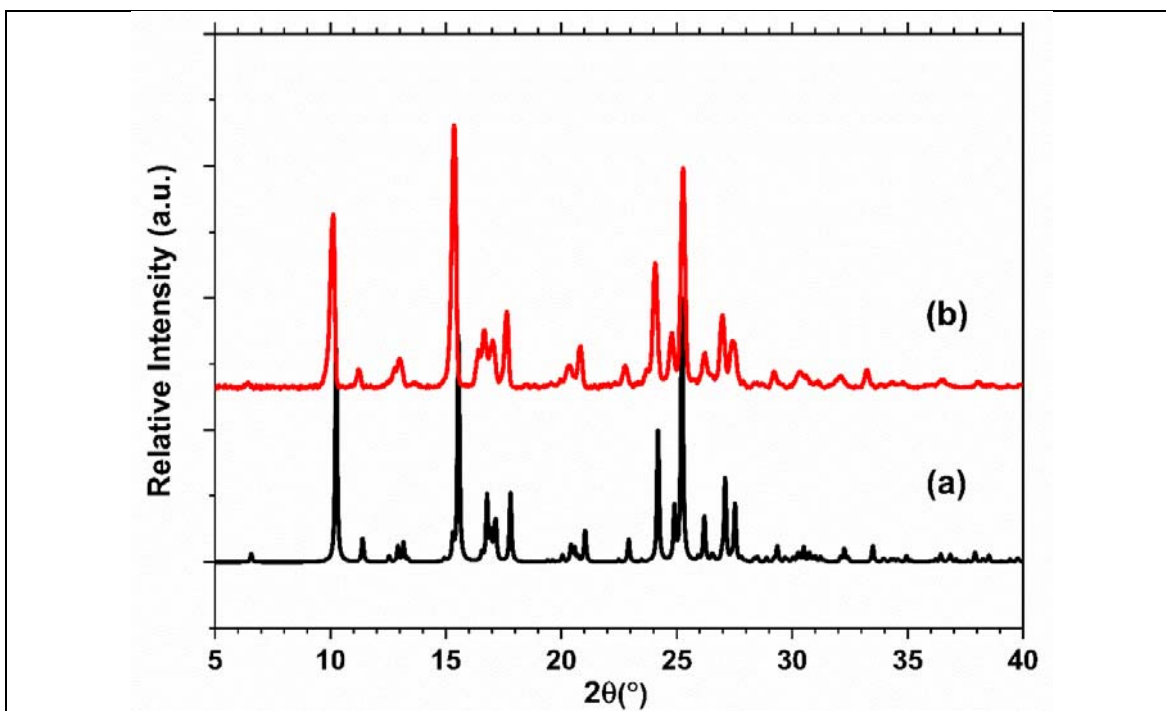

**Figure S2c.** Powder X-ray diffraction patterns of **3** (a) Simulated patterns (b) Experimental ground co-crystals.

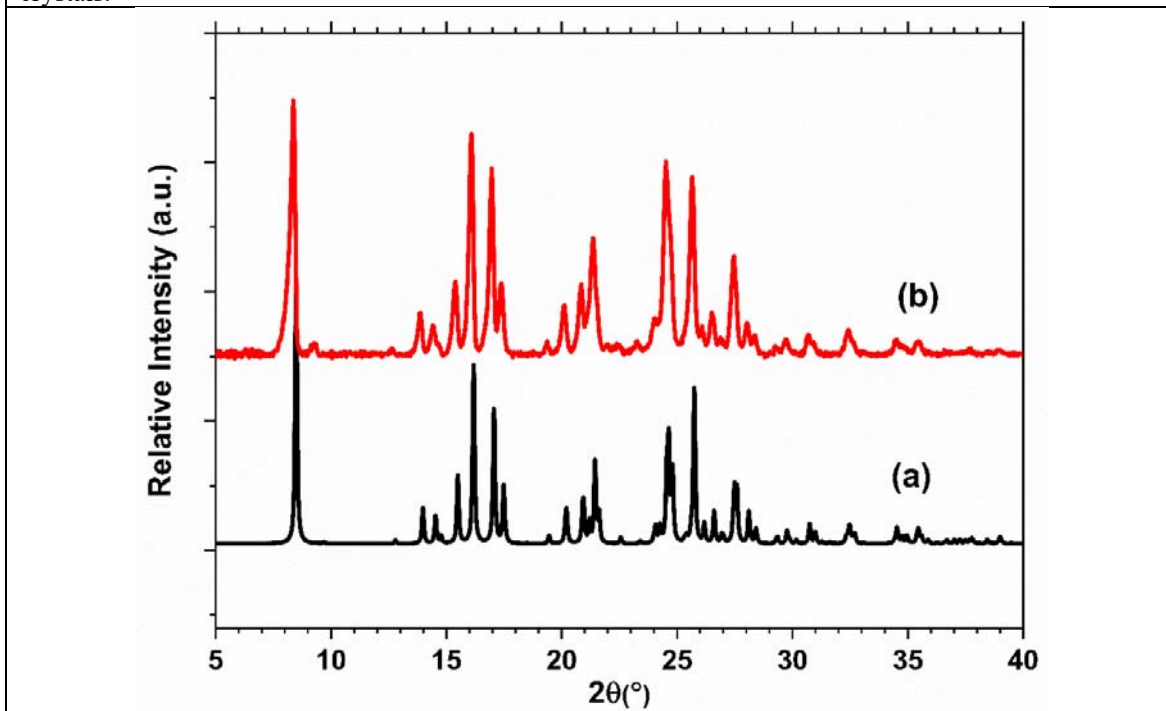

**Figure S2d.** Powder X-ray diffraction patterns of **4** (a) Simulated patterns (b) Experimental ground co-crystals.

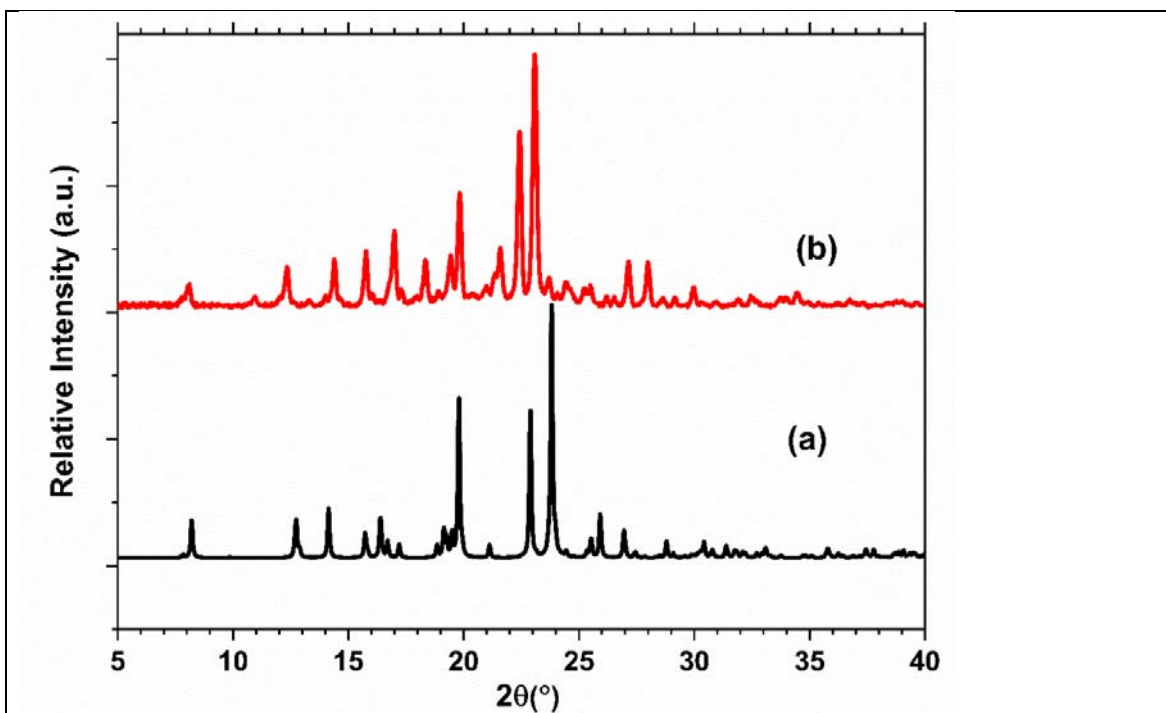

**Figure S2e.** Powder X-ray diffraction patterns of **5** (a) Simulated patterns (b) Experimental ground co-crystals.

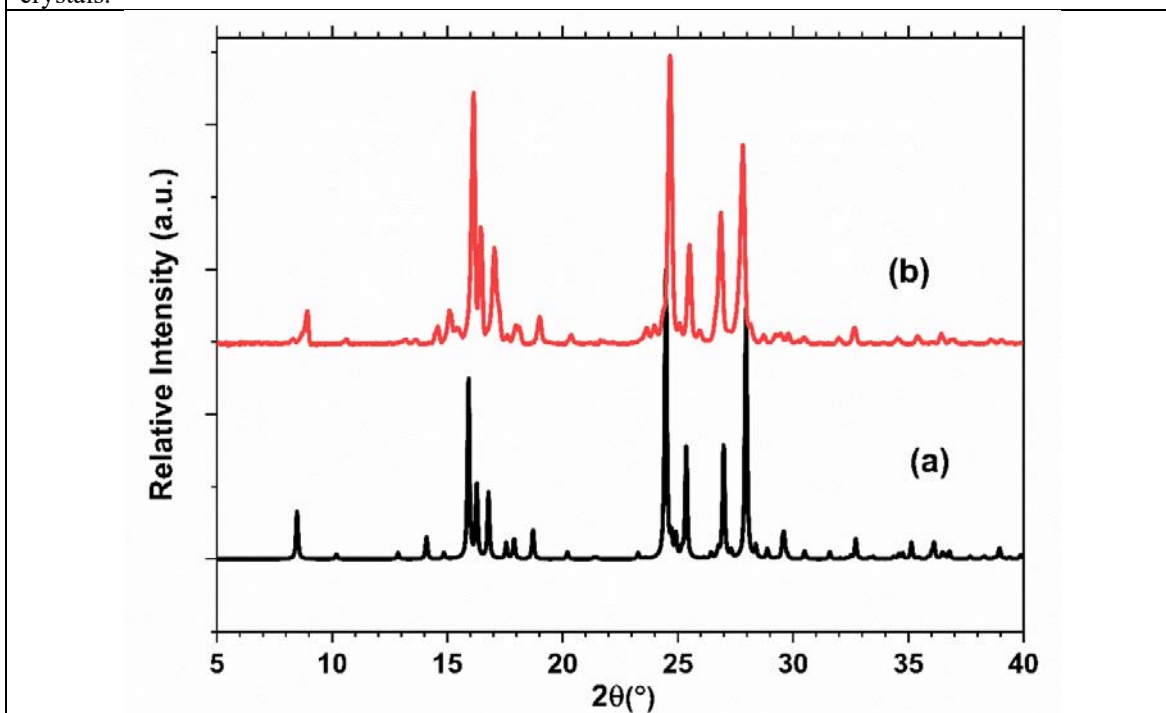

**Figure S2f.** Powder X-ray diffraction patterns of **6** (a) Simulated patterns (b) Experimental ground co-crystals.

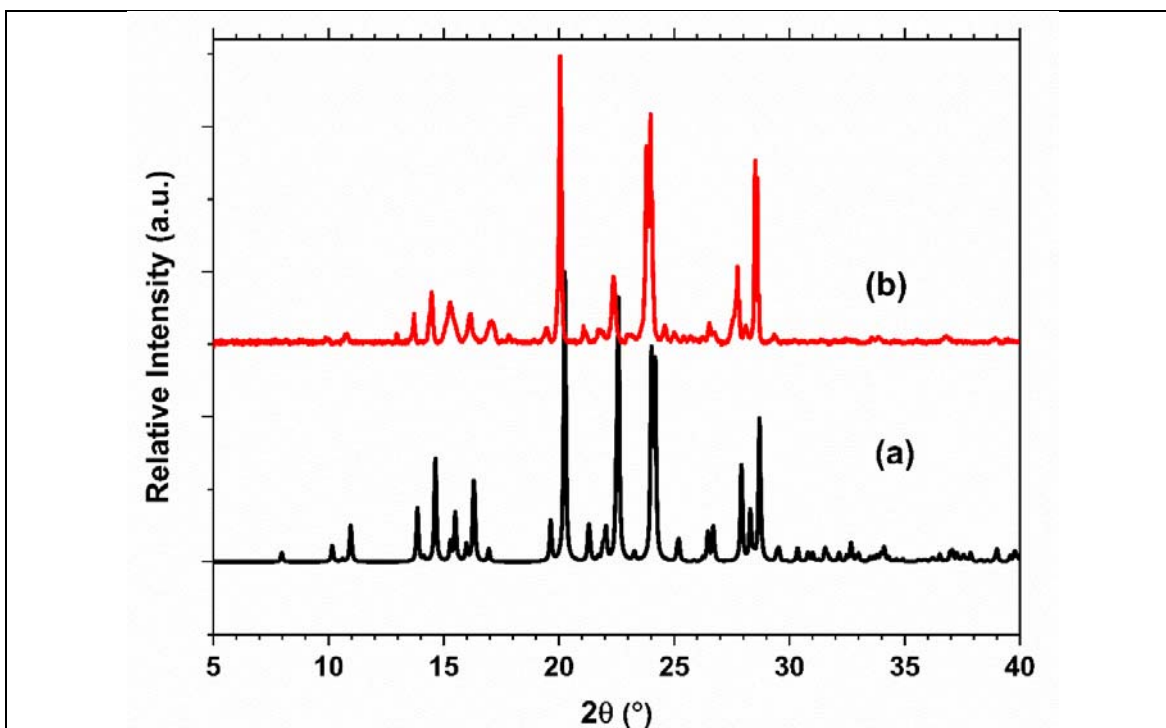

**Figure S2g.** Powder X-ray diffraction patterns of **6a** (a) Simulated patterns (b) Experimental ground co-crystals.

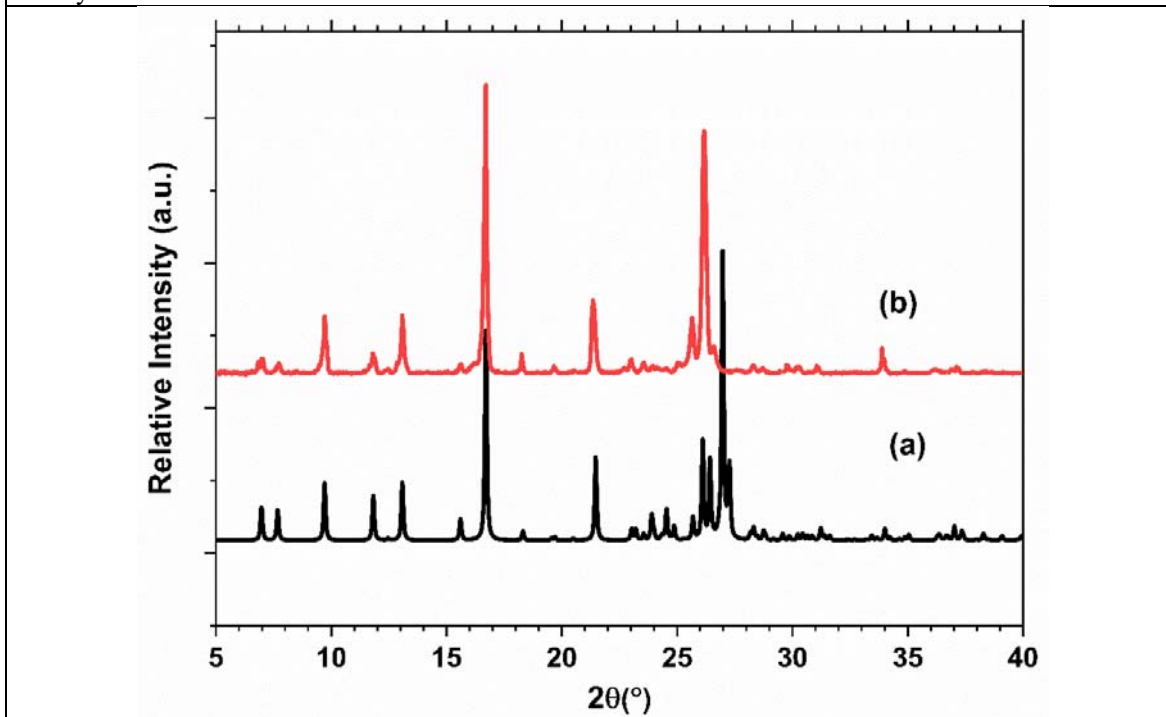

**Figure S2h.** Powder X-ray diffraction patterns of **6b** (a) Simulated patterns (b) Experimental ground co-crystals.

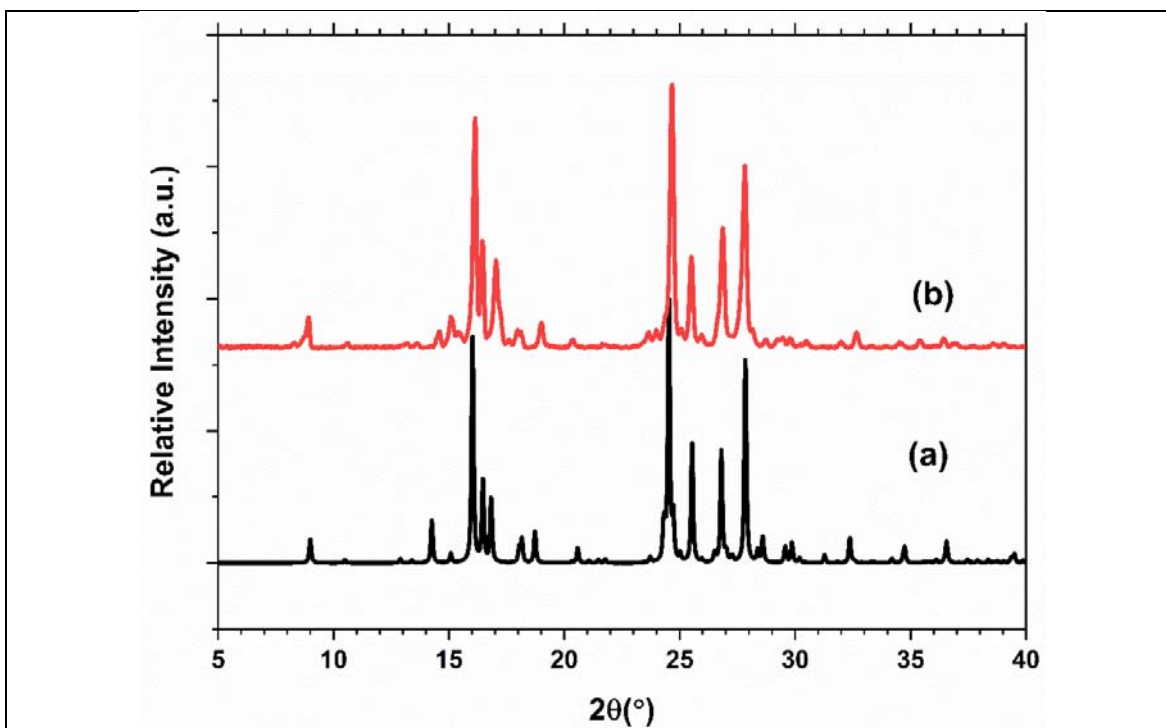

**Figure S2i.** Powder X-ray diffraction patterns of **7** (a) Simulated patterns (b) Experimental ground co-crystals.

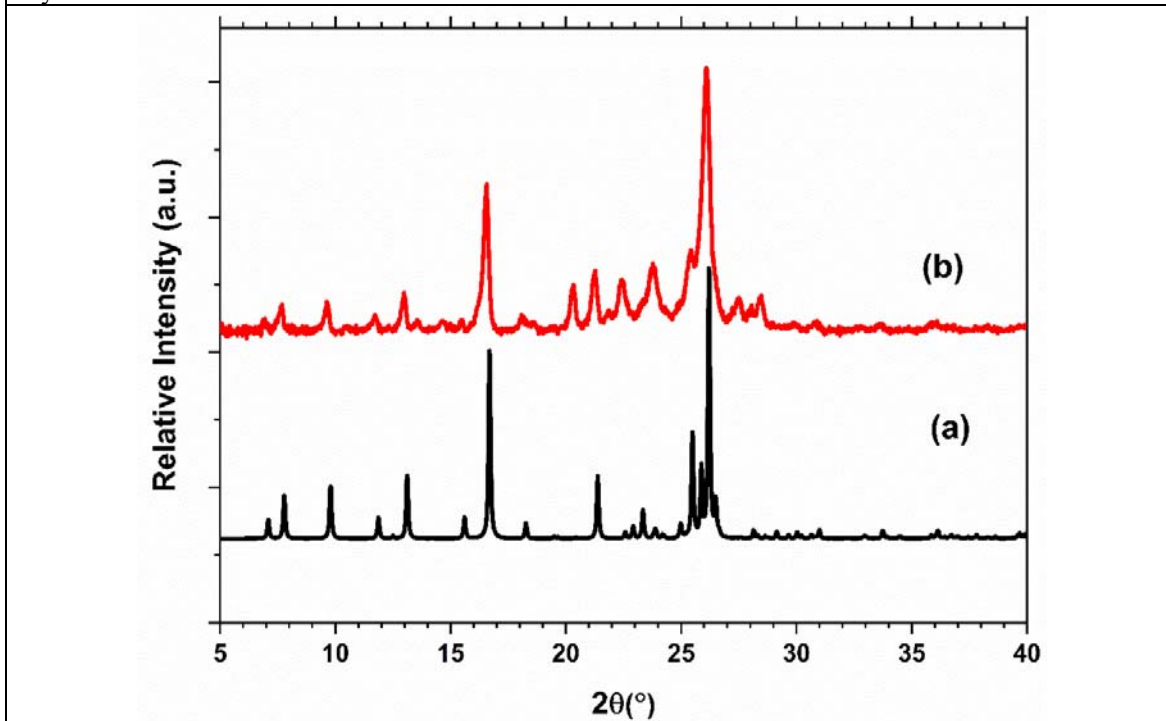

**Figure S2h.** Powder X-ray diffraction patterns of **7b** (a) Simulated patterns (b) Experimental ground co-crystals.

## S4. Isostructurality

The iso-structurality index (Is) is calculated by using formula (1). Unit-cell similarity index  $\Pi$  was also calculated by the formula (2) which uses the unit-cell parameters of the two crystals,

$$(Is)_n = \left| \left[ \sum \frac{(\Delta R_i)^2}{n} \right]^{1/2} - 1 \right| \dots\dots\dots (1)$$

$$\Pi = \frac{a+b+c}{a'+b'+c'} - 1 \dots\dots\dots (2)$$

wherein n is the number of related non-hydrogen atoms,  $\Delta R_i$  are the distance differences between their atomic coordinates.  $a, b, c$  and  $a', b', c'$  are the reduced unit cell axes of the comparable crystal structures, where,  $a + b + c > a' + b' + c'$ . Degree of isostructurality increases as Is value close to 100 and the value of  $\Pi$  tends to zero.

**Table S2.** Similarity index ( $\Pi$ ), Isostructurality Index (Is), root-mean-square deviation (RMSD) and PXRD similarity for all the pairs of structures **1 – 7, 6a, 6b, 7a** and **7b**.

| Co-crystals Pair | $\Pi$ | Is (%) | RMSD  | PXRD  | Co-crystal Pairs | $\Pi$ | Is (%) | RMSD  | PXRD  |
|------------------|-------|--------|-------|-------|------------------|-------|--------|-------|-------|
| <b>1/2</b>       | 0.380 | -15.4  | 1.154 | 0.933 | <b>4/6</b>       | 0.126 | 85.3   | 0.147 | 0.893 |
| <b>1/3</b>       | 0.598 | 87.3   | 0.127 | 0.931 | <b>4/6a</b>      | 0.309 | -25    | 1.25  | 0.858 |
| <b>1/4</b>       | 0.196 | 24.8   | 0.752 | 0.895 | <b>4/6b</b>      | 0.015 | 93.5   | 0.065 | 0.885 |
| <b>1/5</b>       | 0.525 | 82.1   | 0.179 | 0.849 | <b>4/7</b>       | 0.114 | 88.3   | 0.117 | 0.93  |
| <b>1/6</b>       | 0.348 | 86.7   | 0.133 | 0.878 | <b>4/7a</b>      | 0.266 | 84.3   | 0.157 | 0.892 |
| <b>1/6a</b>      | 0.566 | -58.9  | 1.589 | 0.879 | <b>4/7b</b>      | 0.052 | 94.1   | 0.059 | 0.897 |
| <b>1/6b</b>      | 0.154 | 92     | 0.08  | 0.933 | <b>5/6</b>       | 0.131 | 14.8   | 0.852 | 0.771 |
| <b>1/7</b>       | 0.333 | 95.5   | 0.045 | 0.904 | <b>5/6a</b>      | 0.026 | 65.5   | 0.345 | 0.926 |
| <b>1/7a</b>      | 0.515 | 94.6   | 0.054 | 0.928 | <b>5/6b</b>      | 0.321 | 92.2   | 0.078 | 0.791 |
| <b>1/7b</b>      | 0.137 | 93.9   | 0.061 | 0.909 | <b>5/7</b>       | 0.144 | 14.6   | 0.854 | 0.826 |
| <b>2/3</b>       | 0.157 | 91.1   | 0.089 | 0.879 | <b>5/7a</b>      | 0.006 | 65.5   | 0.345 | 0.926 |
| <b>2/4</b>       | 0.153 | -27.7  | 1.277 | 0.791 | <b>5/7b</b>      | 0.341 | 92.5   | 0.075 | 0.808 |
| <b>2/5</b>       | 0.105 | 86.1   | 0.139 | 0.820 | <b>6/6a</b>      | 0.161 | 28.2   | 0.718 | 0.773 |
| <b>2/6</b>       | 0.024 | 94.6   | 0.054 | 0.823 | <b>6/6b</b>      | 0.015 | 94.4   | 0.056 | 0.877 |
| <b>2/6a</b>      | 0.134 | -91.1  | 1.911 | 0.788 | <b>6/7</b>       | 0.011 | 97.5   | 0.025 | 0.959 |
| <b>2/6b</b>      | 0.195 | 90.8   | 0.092 | 0.904 | <b>6/7a</b>      | 0.124 | 95.5   | 0.045 | 0.905 |
| <b>2/7</b>       | 0.035 | 94.5   | 0.055 | 0.836 | <b>6/7b</b>      | 0.185 | 95     | 0.05  | 0.857 |
| <b>2/7a</b>      | 0.097 | 94.8   | 0.052 | 0.874 | <b>6a/6b</b>     | 0.356 | 87.5   | 0.125 | 0.80  |
| <b>2/7b</b>      | 0.214 | 93.8   | 0.062 | 0.904 | <b>6a/7</b>      | 0.174 | 60.3   | 0.397 | 0.826 |
| <b>3/4</b>       | 0.336 | -27.5  | 1.275 | 0.911 | <b>6a/7a</b>     | 0.033 | 47.4   | 0.526 | 0.838 |
| <b>3/5</b>       | 0.047 | -81.0  | 1.81  | 0.847 | <b>6a/7b</b>     | 0.377 | 74.9   | 0.251 | 0.775 |
| <b>3/6</b>       | 0.185 | 94.2   | 0.058 | 0.905 | <b>6b/7</b>      | 0.154 | 94.1   | 0.059 | 0.891 |
| <b>3/6a</b>      | 0.020 | -78.5  | 1.785 | 0.854 | <b>6b/7a</b>     | 0.312 | 96.2   | 0.038 | 0.932 |
| <b>3/6b</b>      | 0.384 | 81     | 0.190 | 0.898 | <b>6b/7b</b>     | 0.015 | 97.0   | 0.03  | 0.932 |
| <b>3/7</b>       | 0.198 | 94.3   | 0.057 | 0.936 | <b>7/7a</b>      | 0.136 | 93.4   | 0.066 | 0.919 |
| <b>3/7a</b>      | 0.054 | 91     | 0.090 | 0.929 | <b>7/7b</b>      | 0.172 | 96.5   | 0.035 | 0.904 |
| <b>3/7b</b>      | 0.405 | 86.9   | 0.131 | 0.913 | <b>7a/7b</b>     | 0.332 | 96.5   | 0.035 | 0.904 |
| <b>4/5</b>       | 0.275 | 86.6   | 0.134 | 0.838 |                  |       |        |       |       |

### S5. BFDH Morphology and Attachment Energies

| Co-crystals | BFDH Morphology                                                                      |
|-------------|--------------------------------------------------------------------------------------|
| 1           | 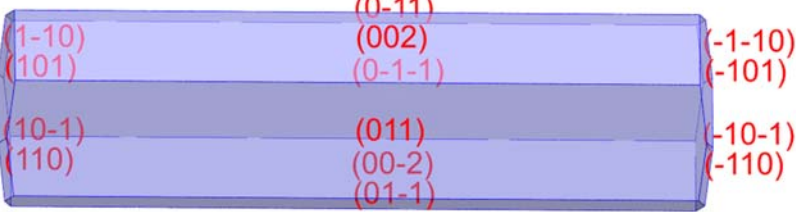   |
| 2           |    |
| 3           |   |
| 4           |  |

|                  |                                                                                      |
|------------------|--------------------------------------------------------------------------------------|
| <p><b>5</b></p>  |    |
| <p><b>6</b></p>  |   |
| <p><b>6a</b></p> |  |



|    |                                                                                      |
|----|--------------------------------------------------------------------------------------|
| 7  | 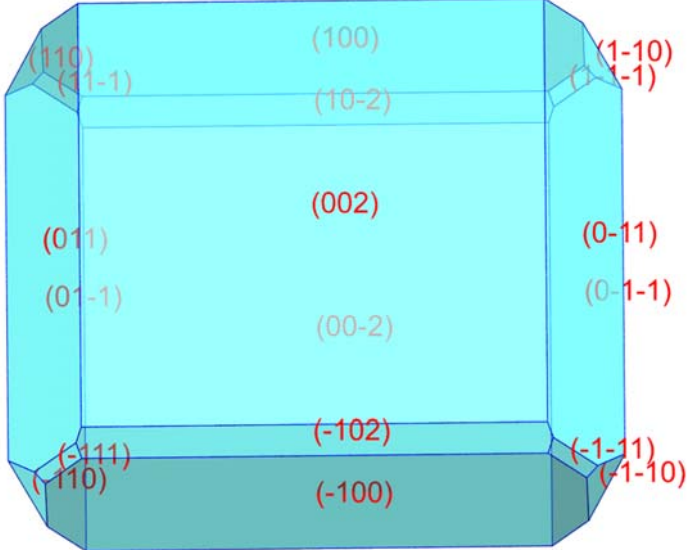   |
| 6b |   |
| 7a |  |
| 7b |  |

## Attachment Energy

The attachment energies were calculated by utilizing the coordinates from the single-crystal structures in BIOVIA Materials Studio 2020 (version 20.1.0.5).

**Table S3.** Attachment Energies of complexes **1 – 7, 6a, 6b, 7a, 7b.**

| Complexes | hkl      | $d_{hkl}$ (Å) | Surface area | $E_{att}$ (Total) (kcal/mol) | Distance | % Total facet area |
|-----------|----------|---------------|--------------|------------------------------|----------|--------------------|
| <b>1</b>  | (011)    | 14.40         | 123.20       | -22.99                       | 22.99    | 55.81              |
|           | (002)    | 13.09         | 67.75        | -19.54                       | 19.54    | 35.96              |
|           | (111)    | 3.79          | 468.12       | -139.14                      | 139.14   | 3.75               |
|           | (020)    | 8.62          | 102.90       | -27.34                       | 27.33    | 0.71               |
| <b>2</b>  | (001)    | 14.01         | 57.68        | -19.38                       | 19.37    | 38.91              |
|           | (10-1)   | 12.80         | 63.14        | -23.02                       | 23.02    | 27.48              |
|           | (100)    | 13.45         | 60.06        | -25.87                       | 25.87    | 21.87              |
|           | (011)    | 3.73          | 216.26       | -88.55                       | 88.55    | 3.35               |
|           | (0-11)   | 3.73          | 216.26       | -88.55                       | 88.55    | 3.35               |
|           | (1-1-1)  | 3.71          | 217.78       | -89.58                       | 89.58    | 1.59               |
|           | (1 -1-1) | 3.71          | 217.78       | -89.58                       | 89.58    | 1.59               |
|           | (110)    | 3.72          | 216.90       | -90.57                       | 90.57    | 0.91               |
|           | (1-10)   | 3.72          | 216.90       | -90.57                       | 90.57    | 0.91               |
| <b>3</b>  | (001)    | 13.44         | 62.27        | -21.31                       | 21.31    | 46.48              |
|           | (010)    | 8.63          | 97.02        | -33.29                       | 33.28    | 27.69              |
|           | (100)    | 7.05          | 118.68       | -50.99                       | 50.99    | 17.03              |
|           | (01-1)   | 7.76          | 107.83       | -39.17                       | 39.17    | 4.29               |
|           | (10-1)   | 6.62          | 126.38       | -55.18                       | 55.18    | 3.29               |
|           | (1-10)   | 5.78          | 144.70       | -62.05                       | 62.05    | 0.89               |
|           | (1-1-1)  | 5.27          | 158.56       | -62.33                       | 62.33    | 0.26               |
|           | <b>4</b> | (10-1)        | 10.38        | 163.02                       | -56.55   | 56.55              |
| (002)     |          | 10.41         | 81.25        | -60.27                       | 60.27    | 31.69              |
| (011)     |          | 6.91          | 244.77       | -116.56                      | 117.88   | 15.12              |
| (110)     |          | 6.091         | 244.77       | -116.56                      | 116.56   | 10.04              |
| (101)     |          | 9.12          | 185.59       | -80.60                       | 80.60    | 9.11               |
| <b>5</b>  | (001)    | 11.26         | 83.84        | -35.42                       | 35.42    | 32.32              |
|           | (010)    | 10.76         | 87.70        | -39.56                       | 39.56    | 27.38              |
|           | (100)    | 6.98          | 135.18       | -57.19                       | 57.19    | 24.76              |
|           | (01-1)   | 8.96          | 135.18       | -43.49                       | 43.49    | 14.76              |
|           | (10-1)   | 6.94          | 137.53       | -76.76                       | 76.76    | 0.50               |
|           | (1-10)   | 6.97          | 136.02       | -82.28                       | 82.44    | 0.02               |
| <b>6</b>  | (002)    | 9.79          | 58.84        | -45.373                      | 45.373   | 40.40              |
|           | (100)    | 8.24          | 139.84       | -58.99                       | 58.99    | 27.13              |
|           | (011)    | 6.68          | 172.51       | -79.65                       | 79.65    | 18.53              |
|           | (110)    | 5.38          | 214.13       | -83.18                       | 83.18    | 9.01               |
|           | (11-1)   | 5.27          | 218.68       | -86.65                       | 88.59    | 4.024              |
|           | (111)    | 5.11          | 225.41       | -88.65                       | 88.65    | 0.87               |
| <b>6a</b> | (001)    | 11.08         | 80.55        | -26.30                       | 26.30    | 32.87              |

|           |         |       |        |         |        |       |
|-----------|---------|-------|--------|---------|--------|-------|
|           | (010)   | 8.70  | 102.60 | -33.90  | 33.90  | 21.43 |
|           | (100)   | 8.34  | 107.00 | -38.86  | 38.86  | 19.98 |
|           | (01-1)  | 8.06  | 110.68 | -36.60  | 36.60  | 13.62 |
|           | (10-1)  | 8.11  | 110.04 | -45.67  | 45.67  | 8.23  |
|           | (1-10)  | 6.38  | 139.77 | -47.20  | 47.20  | 3.84  |
| <b>6b</b> | (0 1 1) | 12.28 | 101.89 | -34.45  | 34.45  | 65.89 |
|           | (0 2 0) | 11.19 | 55.90  | -40.00  | 40.00  | 20.35 |
|           | (1 0 0) | 3.79  | 329.93 | -112.89 | 112.89 | 11.80 |
|           | (1 1 0) | 3.74  | 334.63 | -116.52 | 116.52 | 1.94  |
| <b>7</b>  | (002)   | 9.82  | 61.81  | -51.46  | 51.46  | 41.18 |
|           | (100)   | 8.42  | 144.11 | -67.33  | 67.33  | 29.22 |
|           | (011)   | 6.85  | 177.03 | -96.03  | 96.03  | 19.66 |
|           | (110)   | 5.52  | 219.74 | -102.45 | 102.45 | 7.33  |
|           | (11-1)  | 5.37  | 225.81 | -107.75 | 107.75 | 1.84  |
|           | (111)   | 5.26  | 230.70 | -108.16 | 108.16 | 0.75  |
| <b>7a</b> | (001)   | 15.41 | 44.43  | -10.77  | 10.77  | 52.75 |
|           | (010)   | 11.21 | 61.07  | -15.35  | 15.35  | 36.99 |
|           | (101)   | 3.78  | 181.01 | -55.39  | 55.439 | 10.25 |
| <b>7b</b> | (011)   | 12.45 | 107.03 | -32.85  | 32.85  | 71.49 |
|           | (020)   | 11.34 | 58.75  | -42.12  | 42.12  | 16.52 |
|           | (100)   | 3.93  | 338.78 | -127.04 | 127.04 | 11.98 |
|           | (010)   | 10.76 | 87.70  | -39.56  | 39.56  | 27.38 |
|           | (100)   | 6.98  | 135.18 | -57.19  | 57.19  | 24.76 |
|           | (01-1)  | 8.96  | 135.18 | -43.49  | 43.49  | 14.76 |
|           | (10-1)  | 6.94  | 137.53 | -76.76  | 76.76  | 0.50  |
|           | (1-10)  | 6.97  | 136.02 | -82.28  | 82.44  | 0.02  |

## S6. Hirshfeld Surface Analysis

Table S4. The 3D  $d_{norm}$  Surface and Overall 2D Fingerprint Plots Considering the CB Surface for the Co-crystals **1** - **7**, **6a**, **6b**, **7a** and **7b**.

| Complexes | 3D $d_{norm}$ surface                                                              | 2D finger print (full)                                                             | O...H/H...O                                                                         | N...H/H...N                                                                          | H...H                                                                                | C...H/H...C                                                                          |
|-----------|------------------------------------------------------------------------------------|------------------------------------------------------------------------------------|-------------------------------------------------------------------------------------|--------------------------------------------------------------------------------------|--------------------------------------------------------------------------------------|--------------------------------------------------------------------------------------|
| <b>1</b>  | 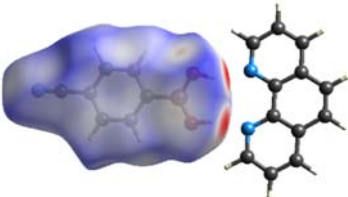  |   |   |   |   |   |
| <b>2</b>  |   |   |   |   |   |   |
| <b>3</b>  |  |  |  |  |  |  |

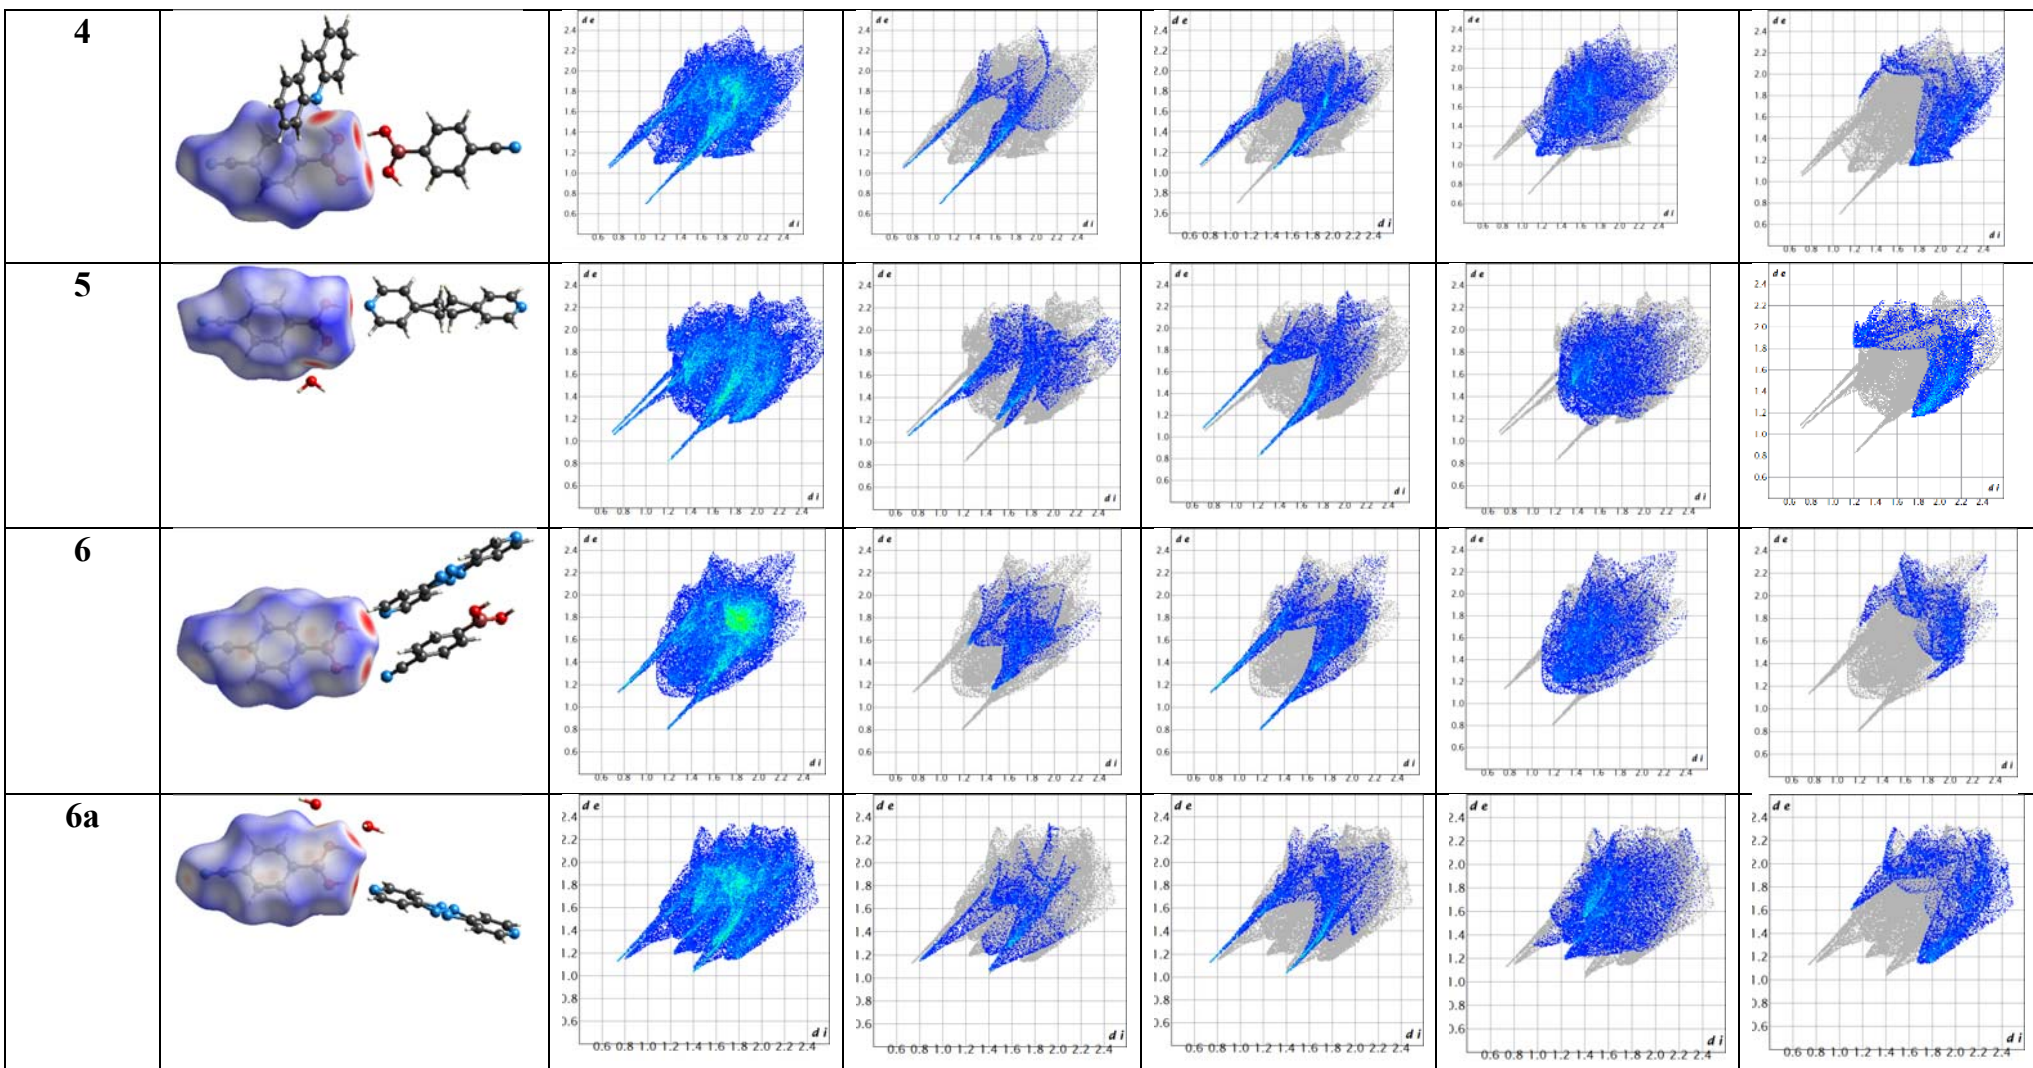

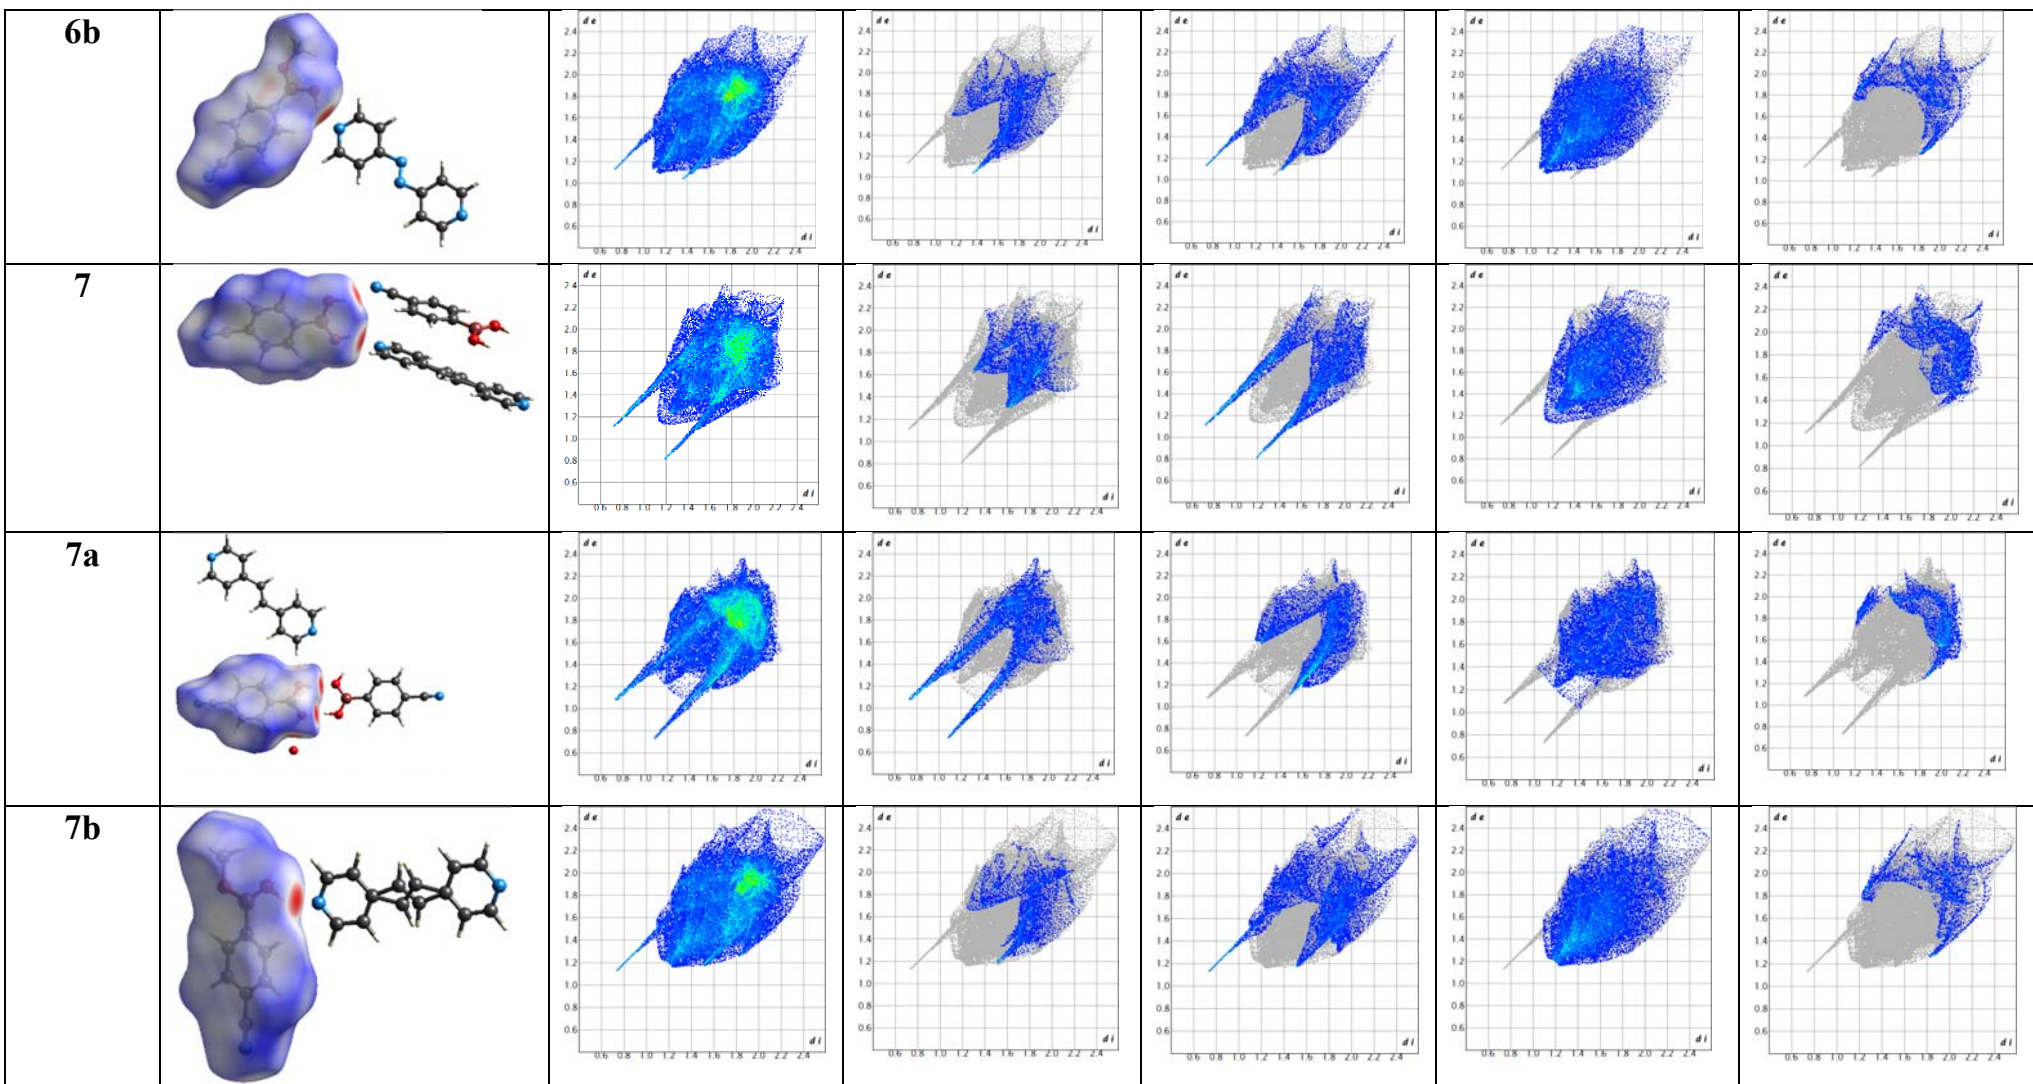

**Table S5. Contribution of Different Intermolecular Interactions in Hirshfeld Surface.**

| <b>Co-crystals</b> | <b>O···H/<br/>H···O</b> | <b>N···H/<br/>H···N</b> | <b>C···H/<br/>H···C</b> | <b>H···H</b> | <b>C···C</b> | <b>H···B</b> | <b>C···O</b> | <b>B···C</b> | <b>B···O</b> | <b>N···C</b> |
|--------------------|-------------------------|-------------------------|-------------------------|--------------|--------------|--------------|--------------|--------------|--------------|--------------|
| <b>1</b>           | 12.5                    | 19.9                    | 15.8                    | 34.8         | 8.3          | 1.5          | 0.2          | 0.5          | 2.7          | 1.2          |
| <b>2</b>           | 13.7                    | 21.2                    | 9.7                     | 34.7         | 10.6         | 1.2          | 1.7          | 2.4          | 1.2          | 1.8          |
| <b>3</b>           | 14.2                    | 21.4                    | 15.6                    | 33.9         | 0.7          | 0            | 6.2          | 4            | 0            | 2.6          |
| <b>4</b>           | 15.1                    | 23.1                    | 18                      | 33.8         | 0.9          | 1.4          | 3.5          | 2.5          | 0            | 1.1          |
| <b>5</b>           | 20.6                    | 21.5                    | 23.9                    | 28           | 0.5          | 2.7          | 1.5          | 0.1          | 0            | 1            |
| <b>6</b>           | 14.1                    | 24.1                    | 11.6                    | 30.6         | 8.4          | 1            | 2.7          | 2.6          | 0            | 3.5          |
| <b>6a</b>          | 14.1                    | 19.3                    | 21.1                    | 30.8         | 1.6          | 1.4          | 3.2          | 2.7          | 0            | 2.6          |
| <b>6b</b>          | 10.7                    | 21.4                    | 9.1                     | 40.1         | 10.9         | 0.7          | 0.3          | 2            | 1.6          | 2.7          |
| <b>7</b>           | 14.3                    | 22.6                    | 11.9                    | 33.1         | 9.6          | 0.7          | 2.4          | 3.4          | 0            | 1.4          |
| <b>7a</b>          | 23.6                    | 19                      | 12                      | 27.2         | 10           | 1.6          | 0.3          | 1.7          | 1.2          | 1.8          |
| <b>7b</b>          | 10.9                    | 20.7                    | 8.5                     | 42           | 10.3         | 0.9          | 0.3          | 2            | 1.4          | 2.5          |

## S7. Interaction Energy Calculation

**Complete details of computational procedure.** The Crystal Explorer software (version 21.5) was utilized to perform the interaction energy by using B3LYP/6-31G(d,p) method. As the co-crystals comprised of multiple molecules within their asymmetric units, the energy contribution from each molecule in the crystal structure was considered individually. To accurately represent the energy contribution from each molecule, a cluster with a radius 3.8 Å was generated around each individual molecule, and the energy calculation was performed accordingly. The resulting clusters of molecules were symmetrically color-coded with respect to each co-former, as shown in Table S6. The scale factor for calculating energy frameworks in Crystal Explorer is given in Table S7. The overall energy profiles of each co-crystal are given below in the following Table S8.

**Table S6.** Cluster of molecules with symmetrically coloured coded in Energy Frameworks calculation.

| Co-crystals | Residue 1 (4-cyanophenylboronic acid)                                               | Residue 1 ( <i>N</i> -donor compound)                                                |
|-------------|-------------------------------------------------------------------------------------|--------------------------------------------------------------------------------------|
| 1           | 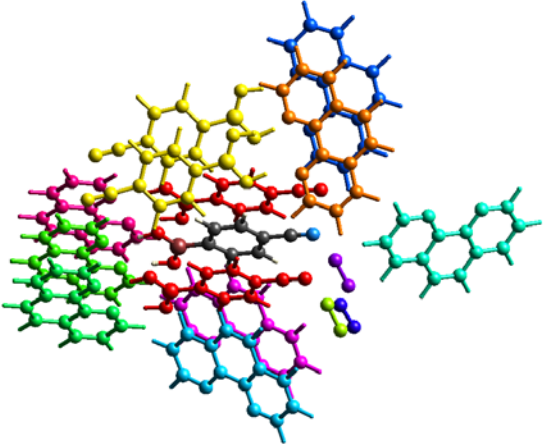  |   |
| 2           |  |  |



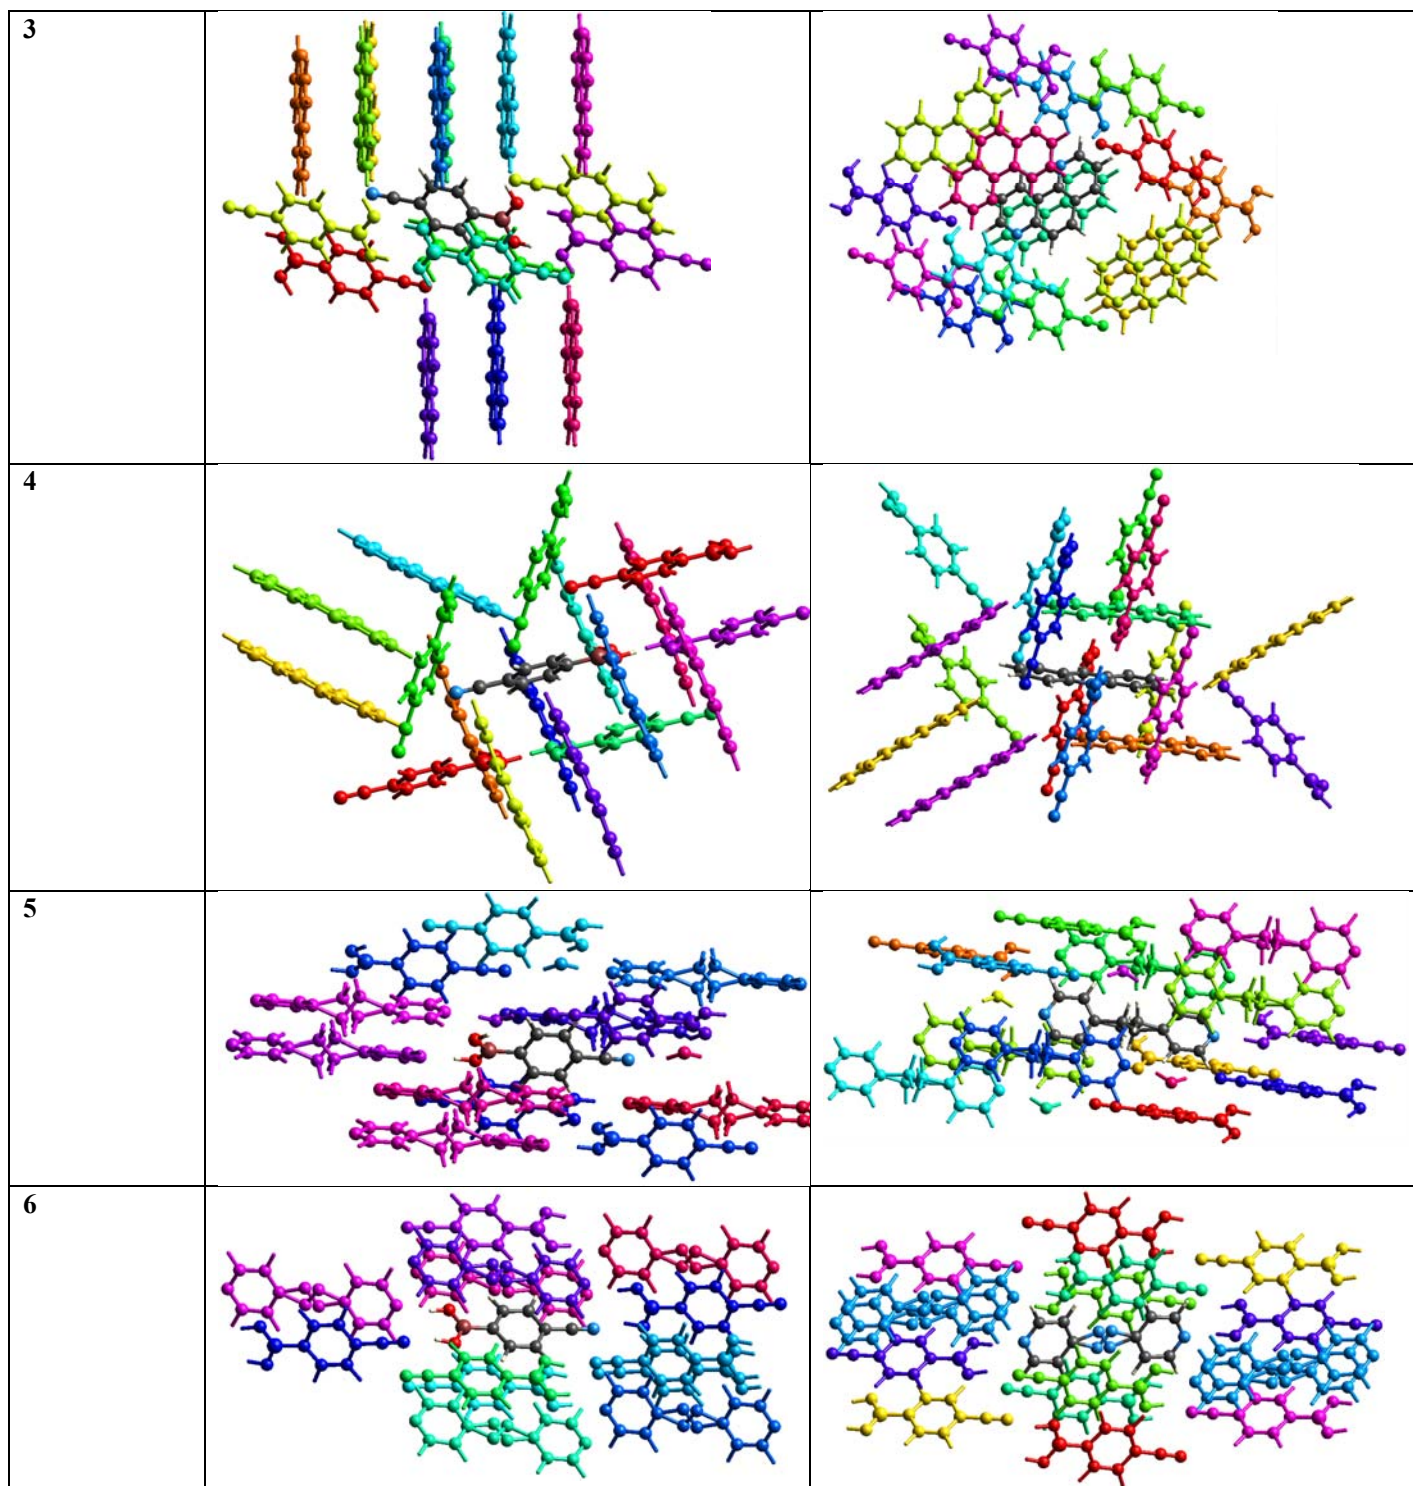

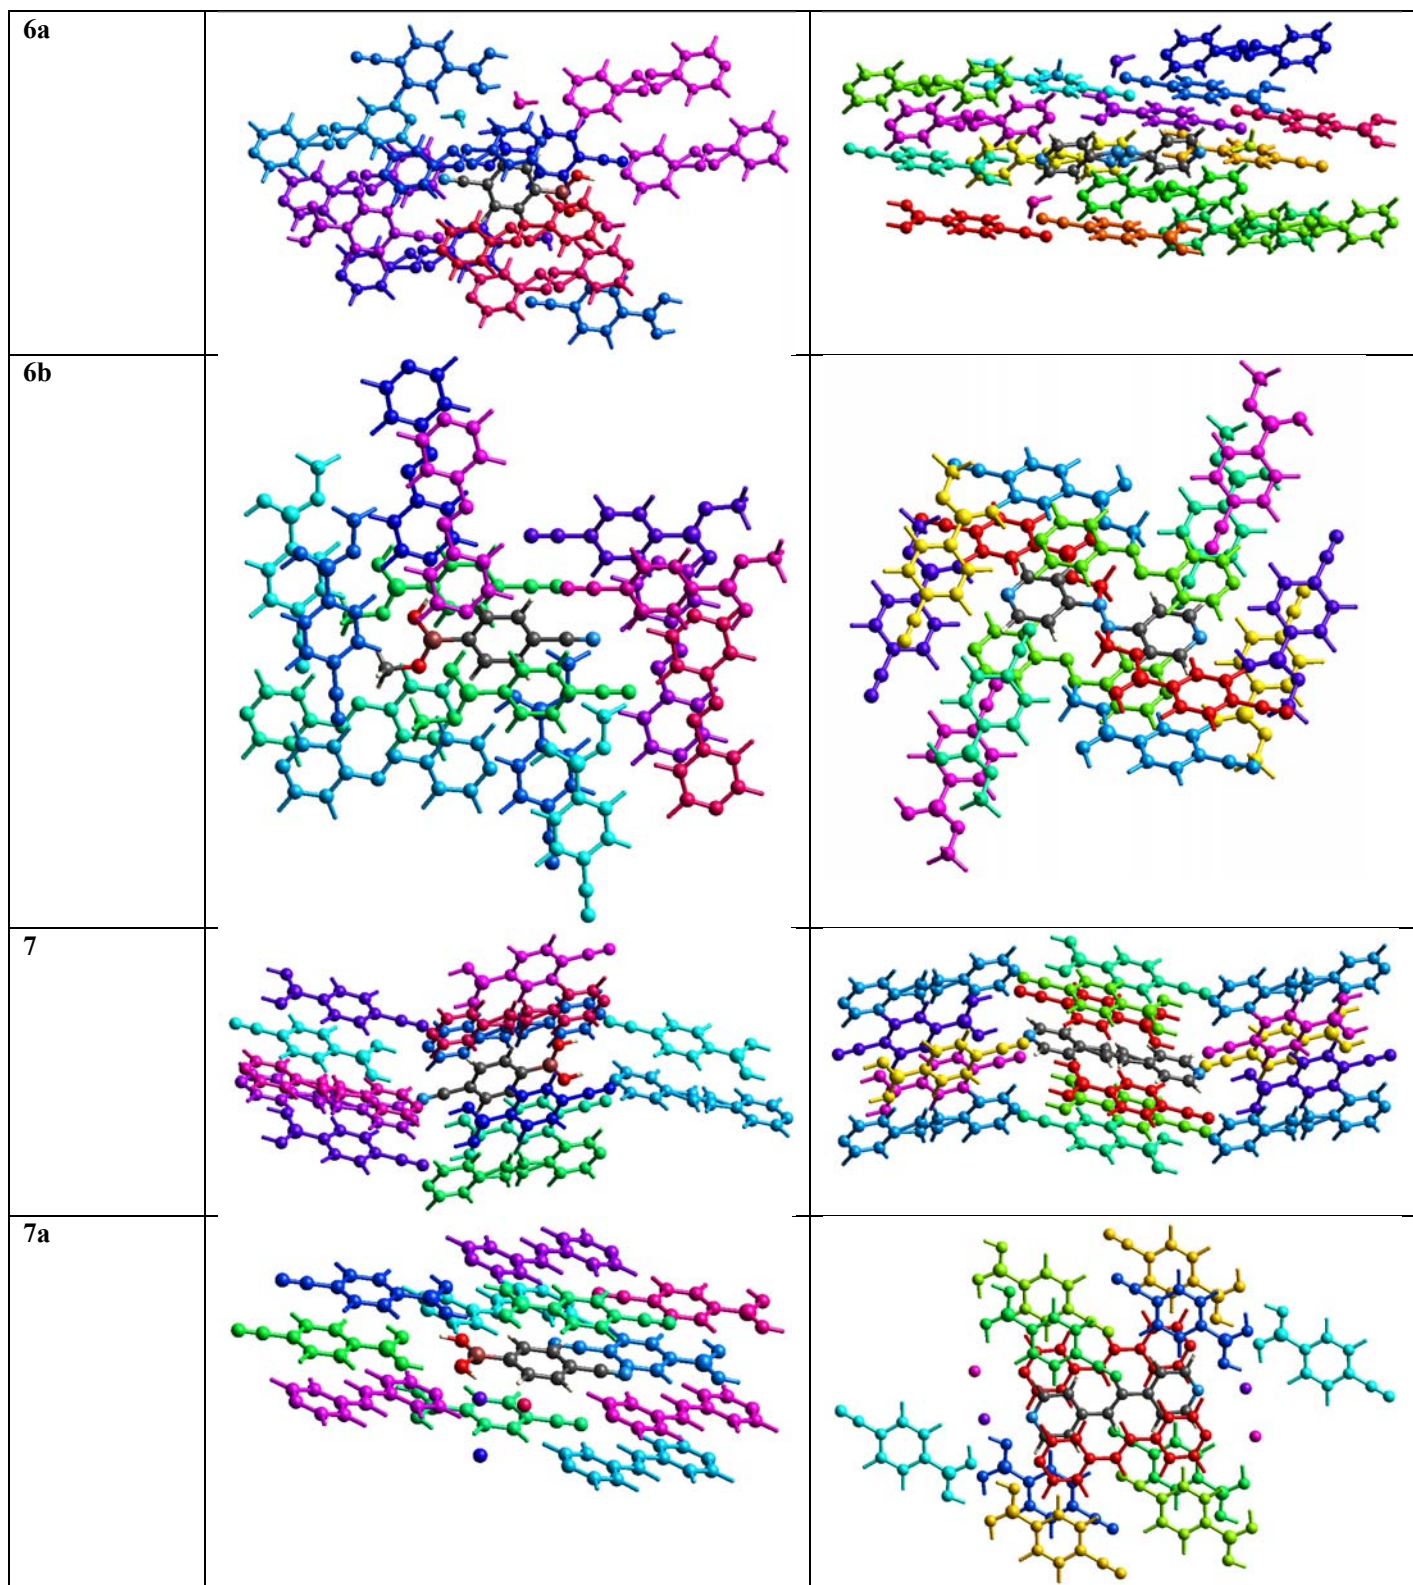

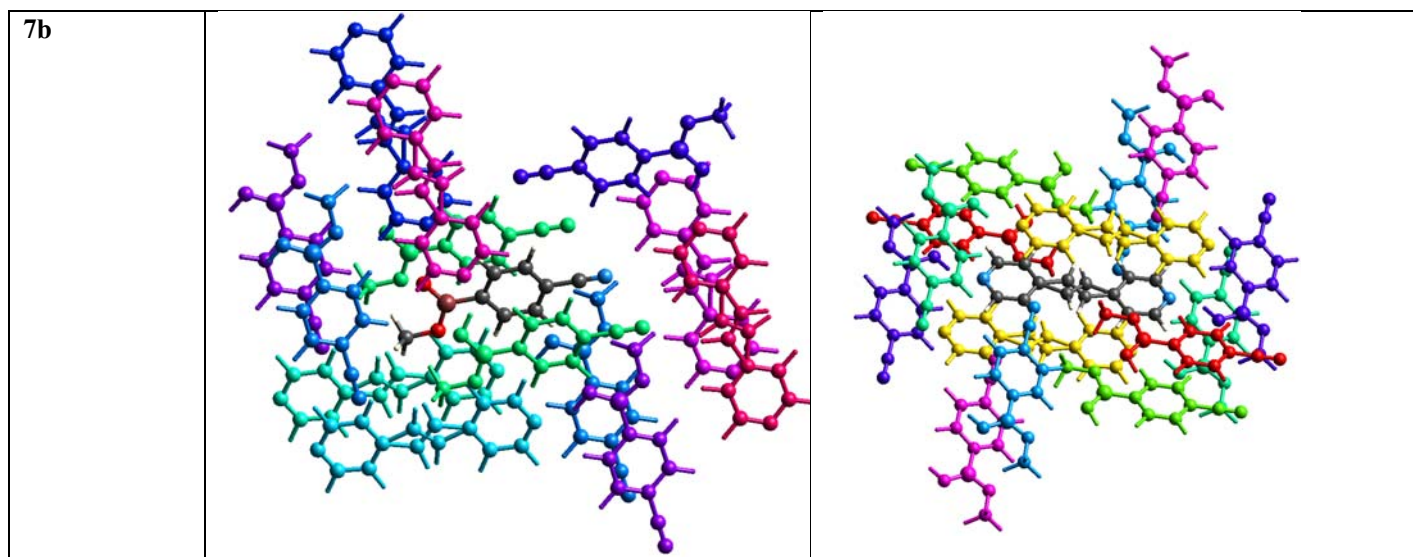

**Table S7.** Pictorial Representation of all Energy Frameworks for Crystal Structures **1 – 7, 6a, 6b, 7a and 7b.**

| Co-crystals | Electrostatic term | Dispersion term | Total interaction energy |
|-------------|--------------------|-----------------|--------------------------|
| 1           |                    |                 |                          |
| 2           |                    |                 |                          |
| 3           |                    |                 |                          |

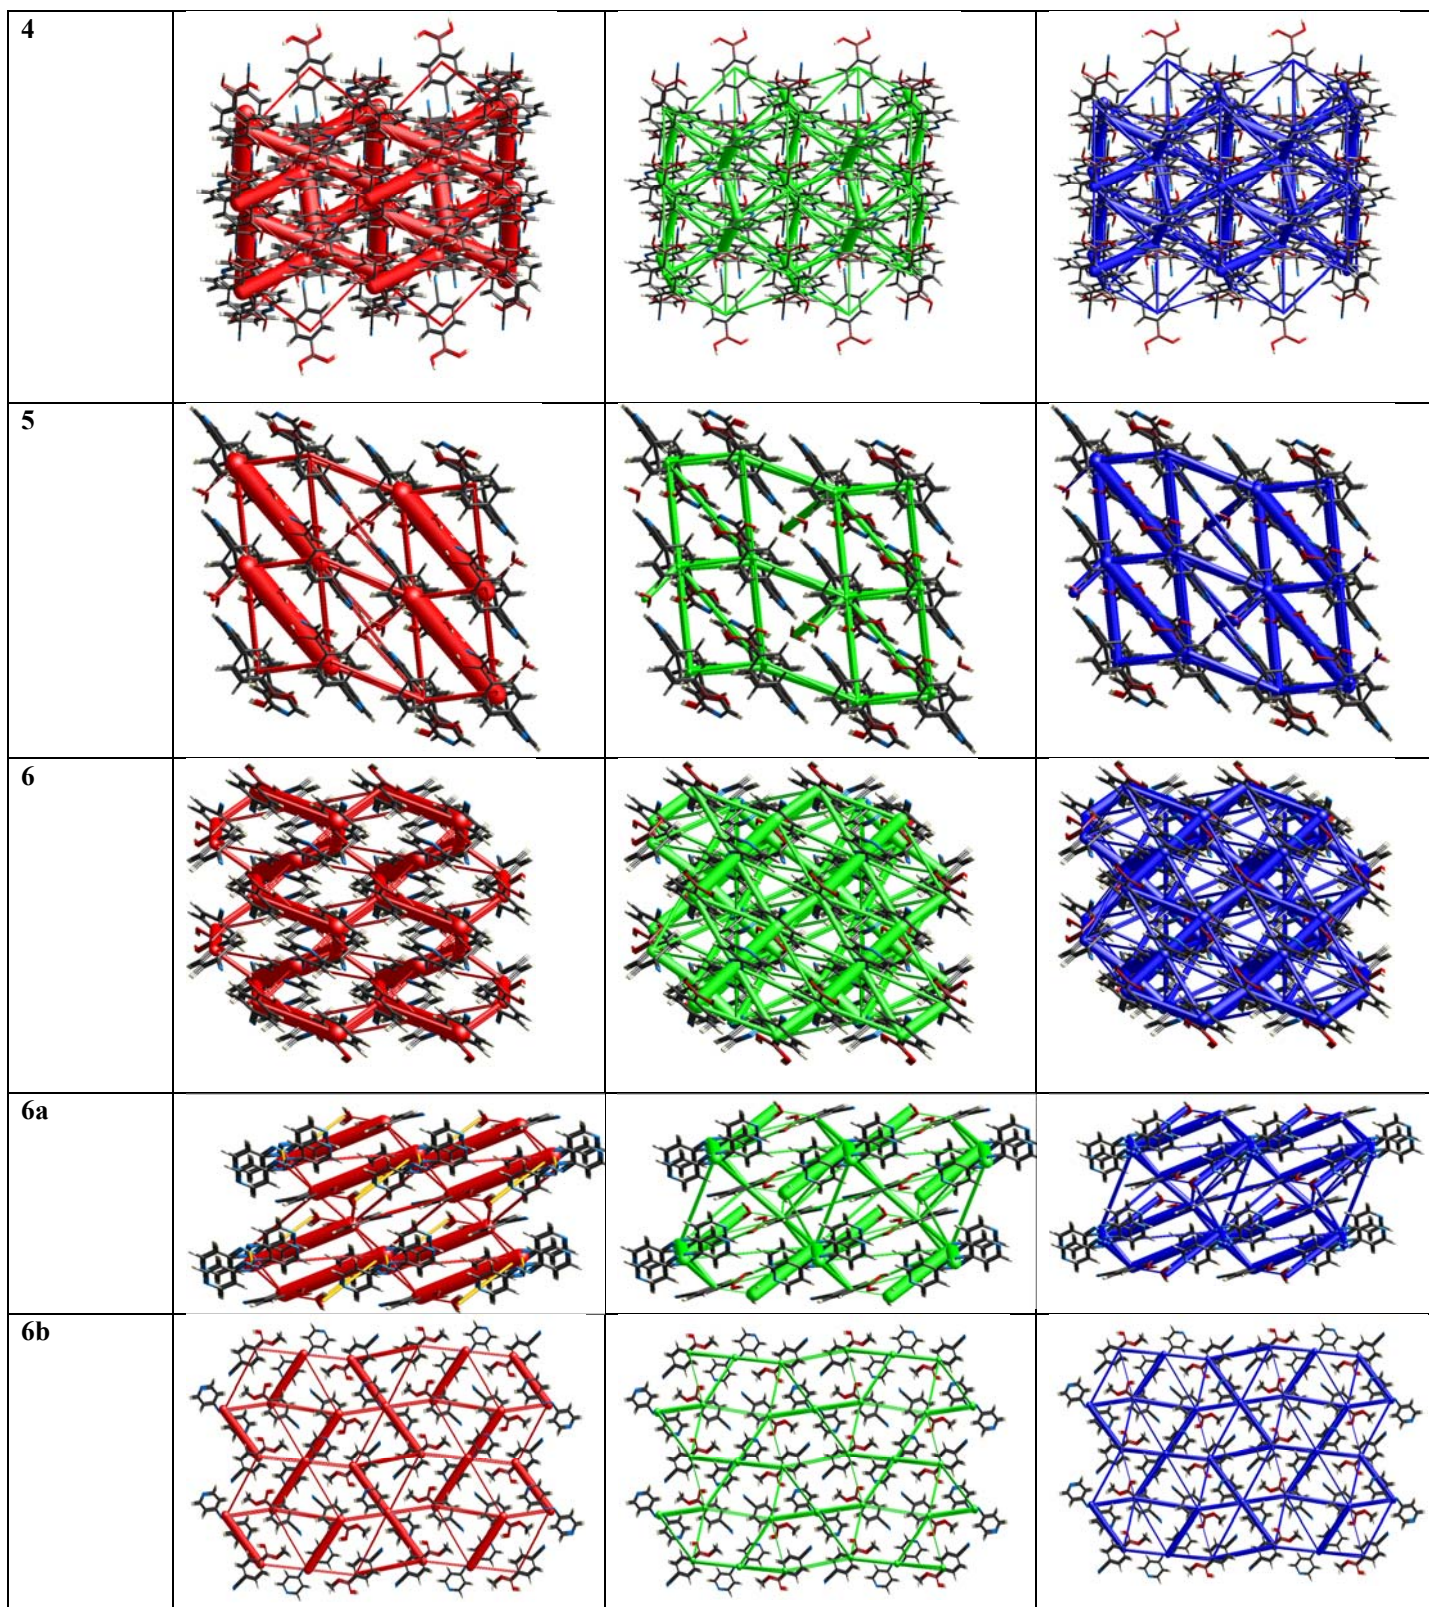

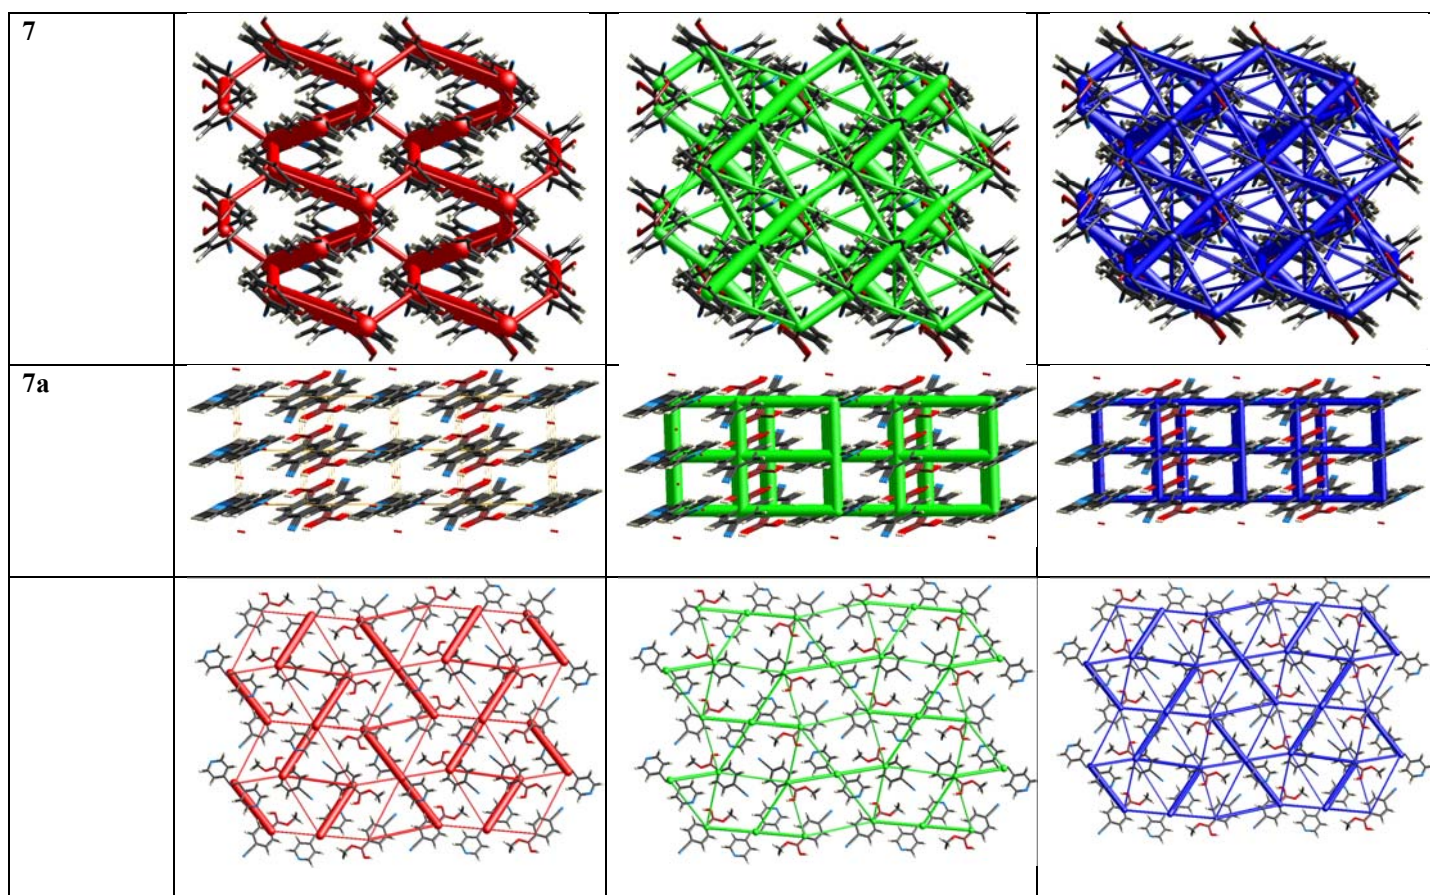

**Table S8.** Scale factors for benchmarked energy models

| Energy Model                                     | $E_{ele}$ | $E_{pol}$ | $E_{dis}$ | $E_{rep}$ |
|--------------------------------------------------|-----------|-----------|-----------|-----------|
| CE-HF ... HF/3-21G electron densities            | 1.019     | 0.651     | 0.901     | 0.811     |
| CE-B3LYP ... B3LYP/6-31G(d,p) electron densities | 1.057     | 0.740     | 0.871     | 0.618     |

**Table S9.** Overall Energy Profile for Co-crystal 1.

|  | N | Symop             | R    | Electron Density | $E_{ele}$ | $E_{pol}$ | $E_{dis}$ | $E_{rep}$ | $E_{tot}$ |
|--|---|-------------------|------|------------------|-----------|-----------|-----------|-----------|-----------|
|  | 0 | -                 | 8.73 | B3LYP/6-31G(d,p) | -4.7      | -1.2      | -2.7      | 0.1       | -8.2      |
|  | 0 | x, y, z           | 3.93 | B3LYP/6-31G(d,p) | 2.3       | -2.5      | -59.3     | 32.1      | -31.2     |
|  | 0 | -                 | 8.82 | B3LYP/6-31G(d,p) | -6.2      | -1.6      | -7.0      | 5.4       | -10.6     |
|  | 0 | -x, y+1/2, -z+1/2 | 8.98 | B3LYP/6-31G(d,p) | -2.6      | -0.6      | -8.3      | 4.1       | -7.9      |
|  | 0 | -                 | 6.40 | B3LYP/6-31G(d,p) | -0.2      | -0.1      | -0.5      | 0.0       | -0.8      |
|  | 0 | -                 | 6.13 | B3LYP/6-31G(d,p) | 0.0       | -0.2      | 0.0       | 0.0       | -0.2      |
|  | 0 | -                 | 7.39 | B3LYP/6-31G(d,p) | -121.0    | -34.6     | -21.4     | 127.9     | -93.1     |

|   |                   |       |                  |        |       |       |       |       |
|---|-------------------|-------|------------------|--------|-------|-------|-------|-------|
| 0 | -                 | 6.63  | B3LYP/6-31G(d,p) | -5.1   | -0.9  | -14.5 | 12.7  | -10.7 |
| 0 | -                 | 8.47  | B3LYP/6-31G(d,p) | -2.4   | -1.7  | -6.0  | 2.9   | -7.3  |
| 0 | -x, y+1/2, -z+1/2 | 8.91  | B3LYP/6-31G(d,p) | -1.7   | -0.4  | -8.9  | 5.5   | -6.5  |
| 0 | -                 | 6.70  | B3LYP/6-31G(d,p) | 0.3    | -0.0  | -0.3  | 0.0   | 0.1   |
| 0 | -                 | 8.00  | B3LYP/6-31G(d,p) | -4.0   | -1.7  | -4.5  | 0.3   | -9.3  |
| 0 | -                 | 10.67 | B3LYP/6-31G(d,p) | -5.4   | -2.2  | -3.8  | 5.2   | -7.5  |
| 0 | -                 | 6.99  | B3LYP/6-31G(d,p) | -0.3   | -0.4  | -10.2 | 5.1   | -6.3  |
| 2 | x, y, z           | 3.93  | B3LYP/6-31G(d,p) | 9.6    | -1.2  | -31.7 | 13.1  | -10.3 |
| 1 | -                 | 8.47  | B3LYP/6-31G(d,p) | -2.4   | -1.7  | -6.0  | 2.9   | -7.3  |
| 2 | x+1/2, -y+1/2, -z | 5.68  | B3LYP/6-31G(d,p) | -11.5  | -0.8  | -15.1 | 12.7  | -18.0 |
| 1 | -                 | 6.22  | B3LYP/6-31G(d,p) | -5.1   | -0.9  | -14.5 | 12.7  | -10.7 |
| 1 | -                 | 7.39  | B3LYP/6-31G(d,p) | -121.0 | -34.6 | -21.4 | 127.9 | -93.1 |
| 1 | -                 | 8.00  | B3LYP/6-31G(d,p) | -4.0   | -1.7  | -4.5  | 0.3   | -9.3  |
| 1 | -                 | 10.67 | B3LYP/6-31G(d,p) | -5.4   | -2.2  | -3.8  | 5.2   | -7.5  |
| 1 | -                 | 6.63  | B3LYP/6-31G(d,p) | -5.1   | -0.9  | -14.5 | 12.7  | -10.7 |
| 1 | -                 | 8.82  | B3LYP/6-31G(d,p) | -6.2   | -1.6  | -7.0  | 5.4   | -10.6 |
| 1 | -                 | 6.91  | B3LYP/6-31G(d,p) | -5.4   | -2.2  | -3.8  | 5.2   | -7.5  |
| 1 | -                 | 6.02  | B3LYP/6-31G(d,p) | -0.3   | -0.4  | -10.2 | 5.1   | -6.3  |
| 1 | -                 | 6.99  | B3LYP/6-31G(d,p) | -0.3   | -0.4  | -10.2 | 5.1   | -6.3  |
| 1 | -                 | 8.73  | B3LYP/6-31G(d,p) | -4.7   | -1.2  | -2.7  | 0.1   | -8.2  |

**Table S10.** Overall Energy Profile for Co-crystal 2.

|  | N | Symop         | R    | Electron Density | E <sub>ele</sub> | E <sub>pol</sub> | E <sub>dis</sub> | E <sub>rep</sub> | E <sub>tot</sub> |
|--|---|---------------|------|------------------|------------------|------------------|------------------|------------------|------------------|
|  | 0 | -             | 9.65 | B3LYP/6-31G(d,p) | -8.7             | -2.2             | -7.8             | 9.5              | -11.7            |
|  | 0 | -x, y+1/2, -z | 8.94 | B3LYP/6-31G(d,p) | 0.8              | -0.5             | -7.2             | 3.0              | -4.0             |
|  | 0 | -             | 7.93 | B3LYP/6-31G(d,p) | -1.2             | -0.7             | -7.9             | 1.7              | -7.6             |
|  | 0 | -             | 7.42 | B3LYP/6-31G(d,p) | -47.2            | -11.3            | -18.0            | 50.1             | -43.0            |
|  | 0 | x, y, z       | 3.88 | B3LYP/6-31G(d,p) | 0.2              | -1.5             | -53.1            | 26.2             | -30.9            |
|  | 0 | -             | 8.57 | B3LYP/6-31G(d,p) | -11.0            | -3.3             | -8.8             | 11.0             | -14.9            |
|  | 0 | -             | 7.33 | B3LYP/6-31G(d,p) | -1.3             | -2.4             | -14.1            | 8.4              | -10.3            |

|   |               |       |                  |       |       |       |      |       |
|---|---------------|-------|------------------|-------|-------|-------|------|-------|
| 0 | -             | 7.73  | B3LYP/6-31G(d,p) | -1.4  | -1.0  | -9.5  | 6.2  | -6.7  |
| 0 | -x, y+1/2, -z | 7.94  | B3LYP/6-31G(d,p) | 1.0   | -0.1  | -5.0  | 0.7  | -3.0  |
| 0 | -             | 9.41  | B3LYP/6-31G(d,p) | -0.8  | -0.4  | -4.1  | 0.8  | -4.2  |
| 0 | -             | 8.56  | B3LYP/6-31G(d,p) | -57.7 | -12.6 | -13.8 | 66.4 | -41.3 |
| 0 | -x, y+1/2, -z | 10.94 | B3LYP/6-31G(d,p) | 0.4   | -0.2  | -2.5  | 0.3  | -1.7  |
| 2 | x, y, z       | 3.88  | B3LYP/6-31G(d,p) | 3.5   | -1.2  | -38.1 | 21.3 | -17.1 |
| 2 | -x, y+1/2, -z | 6.02  | B3LYP/6-31G(d,p) | -6.8  | -0.8  | -12.3 | 10.3 | -12.2 |
| 1 | -             | 9.41  | B3LYP/6-31G(d,p) | -0.8  | -0.4  | -4.1  | 0.8  | -4.2  |
| 1 | -             | 7.33  | B3LYP/6-31G(d,p) | -1.3  | -2.4  | -14.1 | 8.4  | -10.3 |
| 1 | -             | 9.65  | B3LYP/6-31G(d,p) | -8.7  | -2.2  | -7.8  | 9.5  | -11.7 |
| 1 | -             | 8.57  | B3LYP/6-31G(d,p) | -11.0 | -3.3  | -8.8  | 11.0 | -14.9 |
| 1 | -             | 8.56  | B3LYP/6-31G(d,p) | -57.7 | -12.6 | -13.8 | 66.4 | -41.3 |
| 1 | -             | 7.42  | B3LYP/6-31G(d,p) | -47.2 | -11.3 | -18.0 | 50.1 | -43.0 |
| 1 | -             | 7.93  | B3LYP/6-31G(d,p) | -1.2  | -0.7  | -7.9  | 1.7  | -7.6  |
| 1 | -             | 7.73  | B3LYP/6-31G(d,p) | -1.4  | -1.0  | -9.5  | 6.2  | -6.7  |

**Table S11. Overall Energy Profile for Co-crystal 3.**

|  | N | Symop      | R     | Electron Density | E <sub>ele</sub> | E <sub>pol</sub> | E <sub>dis</sub> | E <sub>rep</sub> | E <sub>tot</sub> |
|--|---|------------|-------|------------------|------------------|------------------|------------------|------------------|------------------|
|  | 0 | -          | 7.36  | B3LYP/6-31G(d,p) | 0.0              | -0.6             | -13.2            | 7.3              | -7.4             |
|  | 0 | -          | 10.06 | B3LYP/6-31G(d,p) | -1.8             | -1.2             | -2.6             | 0.7              | -4.7             |
|  | 0 | -x, -y, -z | 7.43  | B3LYP/6-31G(d,p) | -3.1             | -0.7             | -13.6            | 6.3              | -11.7            |
|  | 0 | x, y, z    | 8.75  | B3LYP/6-31G(d,p) | -0.4             | -0.4             | -6.5             | 4.1              | -3.9             |
|  | 0 | -          | 8.10  | B3LYP/6-31G(d,p) | -6.6             | -1.0             | -9.9             | 13.6             | -7.9             |
|  | 0 | -          | 6.52  | B3LYP/6-31G(d,p) | -61.4            | -15.9            | -19.0            | 76.1             | -46.3            |
|  | 0 | -x, -y, -z | 3.95  | B3LYP/6-31G(d,p) | 0.2              | -1.0             | -49.9            | 20.2             | -31.5            |
|  | 0 | -          | 7.13  | B3LYP/6-31G(d,p) | -5.8             | -1.6             | -9.9             | 7.7              | -11.3            |
|  | 0 | -          | 6.62  | B3LYP/6-31G(d,p) | -6.7             | -1.5             | -13.0            | 8.2              | -14.4            |
|  | 0 | -          | 8.52  | B3LYP/6-31G(d,p) | 0.6              | -0.1             | -2.7             | 0.2              | -1.7             |
|  | 0 | -          | 9.29  | B3LYP/6-31G(d,p) | -5.1             | -1.7             | -7.2             | 9.0              | -7.3             |
|  | 0 | -          | 9.34  | B3LYP/6-31G(d,p) | -1.0             | -0.1             | -1.5             | 0.0              | -2.4             |
|  | 0 | -          | 9.61  | B3LYP/6-31G(d,p) | -3.7             | -0.3             | -2.1             | 0.1              | -5.9             |
|  | 0 | -x, -y, -z | 4.05  | B3LYP/6-31G(d,p) | -1.5             | -1.0             | -47.9            | 20.6             | -31.3            |

|   |            |       |                  |       |       |       |      |       |
|---|------------|-------|------------------|-------|-------|-------|------|-------|
| 1 | -x, -y, -z | 7.80  | B3LYP/6-31G(d,p) | -8.4  | -2.4  | -10.5 | 8.9  | -14.3 |
| 1 | -          | 10.06 | B3LYP/6-31G(d,p) | -1.8  | -1.2  | -2.6  | 0.7  | -4.7  |
| 1 | -          | 9.29  | B3LYP/6-31G(d,p) | -5.1  | -1.7  | -7.2  | 9.0  | -7.3  |
| 2 | x, y, z    | 7.15  | B3LYP/6-31G(d,p) | -2.1  | -1.5  | -15.1 | 7.9  | -11.7 |
| 1 | -          | 7.13  | B3LYP/6-31G(d,p) | -5.8  | -1.6  | -9.9  | 7.7  | -11.3 |
| 1 | -x, -y, -z | 5.74  | B3LYP/6-31G(d,p) | -2.5  | -0.2  | -9.3  | 1.7  | -9.8  |
| 1 | -          | 7.36  | B3LYP/6-31G(d,p) | 0.0   | -0.6  | -13.2 | 7.3  | -7.4  |
| 1 | -x, -y, -z | 4.68  | B3LYP/6-31G(d,p) | -2.0  | -0.5  | -25.0 | 7.3  | -19.8 |
| 1 | -          | 6.52  | B3LYP/6-31G(d,p) | -61.4 | -15.9 | -19.0 | 76.1 | -46.3 |
| 1 | -          | 6.62  | B3LYP/6-31G(d,p) | -6.7  | -1.5  | -13.0 | 8.2  | -14.4 |
| 1 | -          | 8.10  | B3LYP/6-31G(d,p) | -6.6  | -1.0  | -9.9  | 13.6 | -7.9  |
| 1 | -          | 8.52  | B3LYP/6-31G(d,p) | 0.6   | -0.1  | -2.7  | 0.2  | -1.7  |
| 1 | -x, -y, -z | 9.19  | B3LYP/6-31G(d,p) | -70.1 | -14.2 | -13.3 | 85.1 | -43.6 |
| 1 | -          | 9.34  | B3LYP/6-31G(d,p) | -1.0  | -0.1  | -1.5  | 0.0  | -2.4  |
| 1 | -          | 9.61  | B3LYP/6-31G(d,p) | -3.7  | -0.3  | -2.1  | 0.1  | -5.9  |

**Table S12. Overall Energy Profile for Co-crystal 4.**

|   | N                    | Symop | R                | Electron Density | E <sub>ele</sub> | E <sub>pol</sub> | E <sub>dis</sub> | E <sub>rep</sub> | E <sub>tot</sub> |
|---|----------------------|-------|------------------|------------------|------------------|------------------|------------------|------------------|------------------|
| 0 | -                    | 6.58  | B3LYP/6-31G(d,p) | -6.4             | -1.2             | -10.5            | 10.0             | -10.6            |                  |
| 0 | -x, -y, -z           | 5.30  | B3LYP/6-31G(d,p) | -4.4             | -1.4             | -43.8            | 25.3             | -28.1            |                  |
| 0 | x+1/2, -y+1/2, z+1/2 | 11.15 | B3LYP/6-31G(d,p) | 0.2              | -0.2             | -4.6             | 2.6              | -2.3             |                  |
| 0 | -                    | 7.52  | B3LYP/6-31G(d,p) | -1.0             | -1.0             | -11.5            | 8.3              | -6.6             |                  |
| 0 | -                    | 7.16  | B3LYP/6-31G(d,p) | -0.1             | -0.6             | -16.5            | 8.9              | -9.4             |                  |
| 0 | -                    | 8.97  | B3LYP/6-31G(d,p) | -0.9             | -0.1             | -1.9             | 0.0              | -2.7             |                  |
| 0 | -x, -y, -z           | 4.02  | B3LYP/6-31G(d,p) | -7.6             | -1.7             | -59.5            | 35.3             | -39.3            |                  |
| 0 | -                    | 11.09 | B3LYP/6-31G(d,p) | -1.2             | -0.7             | -1.7             | 0.2              | -3.1             |                  |
| 0 | -                    | 7.83  | B3LYP/6-31G(d,p) | -0.7             | -0.2             | -2.8             | 0.1              | -3.3             |                  |
| 0 | -                    | 5.75  | B3LYP/6-31G(d,p) | -65.1            | -17.5            | -22.7            | 85.2             | -48.9            |                  |
| 0 | -                    | 7.15  | B3LYP/6-31G(d,p) | -5.2             | -1.6             | -11.0            | 7.0              | -11.9            |                  |
| 0 | -                    | 10.95 | B3LYP/6-31G(d,p) | -3.4             | -1.2             | -3.3             | 3.1              | -5.4             |                  |



|   |                       |       |                  |       |       |       |      |       |
|---|-----------------------|-------|------------------|-------|-------|-------|------|-------|
| 0 | -x+1/2, y+1/2, -z+1/2 | 9.07  | B3LYP/6-31G(d,p) | -1.7  | -0.3  | -8.8  | 2.7  | -8.0  |
| 0 | -                     | 6.49  | B3LYP/6-31G(d,p) | -0.3  | -0.3  | -11.7 | 6.2  | -6.9  |
| 0 | -                     | 8.12  | B3LYP/6-31G(d,p) | -3.1  | -0.4  | -3.3  | 0.2  | -6.4  |
| 2 | x, y, z               | 7.33  | B3LYP/6-31G(d,p) | -1.8  | -1.4  | -12.0 | 4.2  | -10.9 |
| 1 | -                     | 7.15  | B3LYP/6-31G(d,p) | -5.2  | -1.6  | -11.0 | 7.0  | -11.9 |
| 1 | -                     | 11.09 | B3LYP/6-31G(d,p) | -1.2  | -0.7  | -1.7  | 0.2  | -3.1  |
| 1 | -                     | 7.83  | B3LYP/6-31G(d,p) | -0.7  | -0.2  | -2.8  | 0.1  | -3.3  |
| 1 | -                     | 10.95 | B3LYP/6-31G(d,p) | -3.4  | -1.2  | -3.3  | 3.1  | -5.4  |
| 2 | -x+1/2, y+1/2, -z+1/2 | 7.59  | B3LYP/6-31G(d,p) | -6.1  | -1.8  | -6.6  | 8.0  | -8.6  |
| 1 | -x, -y, -z            | 4.92  | B3LYP/6-31G(d,p) | -3.9  | -0.6  | -23.6 | 9.1  | -19.5 |
| 1 | -                     | 5.75  | B3LYP/6-31G(d,p) | -65.1 | -17.5 | -22.7 | 85.2 | -48.9 |
| 1 | -                     | 7.16  | B3LYP/6-31G(d,p) | -0.1  | -0.6  | -16.5 | 8.9  | -9.4  |
| 1 | -                     | 6.58  | B3LYP/6-31G(d,p) | -6.4  | -1.2  | -10.5 | 10.0 | -10.6 |
| 1 | -                     | 7.52  | B3LYP/6-31G(d,p) | -1.0  | -1.0  | -11.5 | 8.3  | -6.6  |
| 1 | -                     | 6.49  | B3LYP/6-31G(d,p) | -0.3  | -0.3  | -11.7 | 6.2  | -6.9  |
| 1 | -x, -y, -z            | 9.15  | B3LYP/6-31G(d,p) | -74.9 | -14.4 | -13.4 | 95.2 | -42.8 |
| 1 | -                     | 8.12  | B3LYP/6-31G(d,p) | -3.1  | -0.4  | -3.3  | 0.2  | -6.4  |
| 1 | -                     | 8.97  | B3LYP/6-31G(d,p) | -0.9  | -0.1  | -1.9  | 0.0  | -2.7  |

**Table S13. Overall Energy Profile for Co-crystal 5.**

|  | N | Symop      | R     | Electron Density | E <sub>ele</sub> | E <sub>pol</sub> | E <sub>dis</sub> | E <sub>rep</sub> | E <sub>tot</sub> |
|--|---|------------|-------|------------------|------------------|------------------|------------------|------------------|------------------|
|  | 0 | -          | 5.52  | B3LYP/6-31G(d,p) | -6.3             | -2.7             | -29.1            | 19.2             | -22.1            |
|  | 0 | -          | 10.75 | B3LYP/6-31G(d,p) | -4.9             | -0.4             | -3.6             | 1.0              | -8.0             |
|  | 0 | -          | 6.17  | B3LYP/6-31G(d,p) | -3.4             | -2.2             | -25.5            | 12.3             | -19.9            |
|  | 0 | -          | 7.35  | B3LYP/6-31G(d,p) | -0.1             | -1.0             | 0.0              | 0.0              | -1.1             |
|  | 0 | x, y, z    | 7.55  | B3LYP/6-31G(d,p) | -16.1            | -5.1             | -27.6            | 9.0              | -39.3            |
|  | 0 | -          | 6.01  | B3LYP/6-31G(d,p) | 1.9              | -1.3             | -20.9            | 10.7             | -10.6            |
|  | 0 | -x, -y, -z | 5.74  | B3LYP/6-31G(d,p) | -1.5             | -0.8             | -26.9            | 14.1             | -16.9            |
|  | 0 | -          | 6.64  | B3LYP/6-31G(d,p) | -7.6             | -0.8             | -4.8             | 0.0              | -12.8            |
|  | 0 | -x, -y, -z | 12.23 | B3LYP/6-31G(d,p) | -7.6             | -0.8             | -4.8             | 0.0              | -12.8            |

|   |            |       |                  |       |       |       |      |       |
|---|------------|-------|------------------|-------|-------|-------|------|-------|
| 0 | -          | 9.14  | B3LYP/6-31G(d,p) | -4.9  | -1.6  | -7.5  | 1.6  | -11.9 |
| 0 | -x, -y, -z | 6.89  | B3LYP/6-31G(d,p) | -12.1 | -5.2  | -32.2 | 26.8 | -28.1 |
| 0 | -          | 10.52 | B3LYP/6-31G(d,p) | -5.7  | -1.2  | -4.8  | 3.1  | -9.3  |
| 0 | -          | 10.60 | B3LYP/6-31G(d,p) | -67.4 | -17.0 | -11.4 | 73.6 | -48.4 |
| 0 | -          | 4.05  | B3LYP/6-31G(d,p) | -16.1 | -5.1  | -27.6 | 9.0  | -39.3 |
| 0 | -x, -y, -z | 9.20  | B3LYP/6-31G(d,p) | -4.7  | -0.5  | -11.4 | 6.4  | -11.3 |
| 0 | -          | 6.06  | B3LYP/6-31G(d,p) | -12.1 | -5.2  | -32.2 | 26.8 | -28.1 |
| 1 | -x, -y, -z | 7.49  | B3LYP/6-31G(d,p) | 3.2   | -0.7  | -3.0  | 0.2  | 0.4   |
| 1 | -          | 4.63  | B3LYP/6-31G(d,p) | -4.9  | -1.6  | -7.5  | 1.6  | -11.9 |
| 1 | -          | 9.14  | B3LYP/6-31G(d,p) | -4.9  | -1.6  | -7.5  | 1.6  | -11.9 |
| 2 | x, y, z    | 7.55  | B3LYP/6-31G(d,p) | -2.3  | -1.4  | -10.3 | 3.5  | -10.2 |
| 1 | -x, -y, -z | 5.76  | B3LYP/6-31G(d,p) | -10.0 | -1.1  | -14.5 | 10.0 | -17.9 |
| 1 | -          | 5.52  | B3LYP/6-31G(d,p) | -6.3  | -2.7  | -29.1 | 19.2 | -22.1 |
| 1 | -x, -y, -z | 6.71  | B3LYP/6-31G(d,p) | -14.7 | -2.5  | -14.7 | 7.9  | -25.4 |
| 1 | -          | 4.46  | B3LYP/6-31G(d,p) | -4.9  | -0.4  | -3.6  | 1.0  | -8.0  |
| 1 | -          | 10.60 | B3LYP/6-31G(d,p) | -67.4 | -17.0 | -11.4 | 73.6 | -48.4 |
| 1 | -          | 10.75 | B3LYP/6-31G(d,p) | -4.9  | -0.4  | -3.6  | 1.0  | -8.0  |
| 1 | -          | 6.17  | B3LYP/6-31G(d,p) | -3.4  | -2.2  | -25.5 | 12.3 | -19.9 |
| 1 | -          | 6.01  | B3LYP/6-31G(d,p) | 1.9   | -1.3  | -20.9 | 10.7 | -10.6 |
| 1 | -          | 7.22  | B3LYP/6-31G(d,p) | 4.3   | -0.2  | -0.3  | 0.0  | 4.1   |
| 1 | -          | 10.52 | B3LYP/6-31G(d,p) | -5.7  | -1.2  | -4.8  | 3.1  | -9.3  |

**Table S14. Overall Energy Profile for Co-crystal 6.**

|  | N | Symop             | R     | Electron Density | E <sub>ele</sub> | E <sub>pol</sub> | E <sub>dis</sub> | E <sub>rep</sub> | E <sub>tot</sub> |
|--|---|-------------------|-------|------------------|------------------|------------------|------------------|------------------|------------------|
|  | 0 | -                 | 6.19  | B3LYP/6-31G(d,p) | -1.0             | -1.6             | -14.3            | 8.1              | -9.6             |
|  | 0 | -                 | 10.43 | B3LYP/6-31G(d,p) | -4.9             | -1.6             | -5.8             | 8.7              | -6.1             |
|  | 0 | -                 | 3.77  | B3LYP/6-31G(d,p) | -5.5             | -6.0             | -52.5            | 29.5             | -37.8            |
|  | 0 | -                 | 5.27  | B3LYP/6-31G(d,p) | -1.1             | -2.3             | -25.3            | 15.0             | -15.6            |
|  | 0 | -x, y+1/2, -z+1/2 | 10.46 | B3LYP/6-31G(d,p) | -3.0             | -1.1             | -7.7             | 4.9              | -7.7             |
|  | 0 | -                 | 10.52 | B3LYP/6-31G(d,p) | -57.8            | -15.6            | -9.0             | 57.3             | -45.1            |
|  | 0 | -                 | 9.98  | B3LYP/6-31G(d,p) | -3.6             | -1.5             | -4.6             | 2.3              | -7.6             |
|  | 1 | -x, -y, -z        | 6.05  | B3LYP/6-31G(d,p) | -4.6             | -0.8             | -14.8            | 9.0              | -12.9            |

|   |                   |       |                  |       |       |       |      |       |
|---|-------------------|-------|------------------|-------|-------|-------|------|-------|
| 1 | -                 | 6.19  | B3LYP/6-31G(d,p) | -1.0  | -1.6  | -14.3 | 8.1  | -9.6  |
| 1 | -x, -y, -z        | 3.64  | B3LYP/6-31G(d,p) | -17.1 | -1.5  | -40.8 | 25.6 | -38.9 |
| 2 | -x, y+1/2, -z+1/2 | 9.65  | B3LYP/6-31G(d,p) | -2.1  | -1.8  | -3.4  | 1.4  | -5.6  |
| 1 | -                 | 10.43 | B3LYP/6-31G(d,p) | -4.9  | -1.6  | -5.8  | 8.7  | -6.1  |
| 2 | x, -y+1/2, z+1/2  | 9.97  | B3LYP/6-31G(d,p) | -33.9 | -8.2  | -5.3  | 30.6 | -27.6 |
| 1 | -                 | 3.77  | B3LYP/6-31G(d,p) | -5.5  | -6.0  | -52.5 | 29.5 | -37.8 |
| 1 | -x, -y, -z        | 5.79  | B3LYP/6-31G(d,p) | -12.8 | -0.7  | -18.0 | 16.5 | -19.5 |
| 1 | -                 | 10.52 | B3LYP/6-31G(d,p) | -57.8 | -15.6 | -9.0  | 57.3 | -45.1 |
| 1 | -                 | 5.27  | B3LYP/6-31G(d,p) | -1.1  | -2.3  | -25.3 | 15.0 | -15.6 |
| 1 | -                 | 9.98  | B3LYP/6-31G(d,p) | -3.6  | -1.5  | -4.6  | 2.3  | -7.6  |

**Table S15. Overall Energy Profile for Co-crystal 6a.**

|  | N | Symop      | R     | Electron Density | E <sub>ele</sub> | E <sub>pol</sub> | E <sub>dis</sub> | E <sub>rep</sub> | E <sub>tot</sub> |
|--|---|------------|-------|------------------|------------------|------------------|------------------|------------------|------------------|
|  | 0 | -          | 9.17  | B3LYP/6-31G(d,p) | 0.0              | -1.2             | 0.0              | 0.0              | -0.9             |
|  | 0 | -          | 4.73  | B3LYP/6-31G(d,p) | -7.3             | -2.2             | -27.2            | 15.0             | -23.7            |
|  | 0 | -          | 9.30  | B3LYP/6-31G(d,p) | -0.1             | -0.5             | -5.8             | 2.3              | -4.2             |
|  | 0 | -x, -y, -z | 5.34  | B3LYP/6-31G(d,p) | 0.1              | -3.4             | -32.5            | 13.7             | -22.2            |
|  | 0 | -          | 7.20  | B3LYP/6-31G(d,p) | 0.0              | -0.2             | -0.3             | 0.0              | -0.5             |
|  | 0 | x, y, z    | 12.22 | B3LYP/6-31G(d,p) | 0.0              | 0.0              | 0.0              | 0.0              | 0.0              |
|  | 0 | -x, -y, -z | 3.86  | B3LYP/6-31G(d,p) | 12.5             | -8.0             | -64.3            | 25.5             | -32.9            |
|  | 0 | -x, -y, -z | 11.94 | B3LYP/6-31G(d,p) | -1.0             | -0.1             | -0.9             | 0.0              | -1.9             |
|  | 0 | -          | 10.57 | B3LYP/6-31G(d,p) | -61.7            | -16.7            | -9.5             | 58.4             | -49.8            |
|  | 0 | -          | 5.69  | B3LYP/6-31G(d,p) | -7.4             | -4.1             | -24.3            | 12.4             | -24.4            |
|  | 0 | -          | 6.48  | B3LYP/6-31G(d,p) | -0.9             | -0.4             | -2.3             | 0.0              | -3.2             |
|  | 0 | -          | 7.50  | B3LYP/6-31G(d,p) | -2.6             | -1.1             | -10.0            | 3.0              | -10.4            |
|  | 0 | -x, -y, -z | 8.78  | B3LYP/6-31G(d,p) | -3.6             | -0.5             | -7.7             | 2.2              | -9.5             |
|  | 0 | -          | 5.52  | B3LYP/6-31G(d,p) | -3.6             | -0.5             | -7.7             | 2.2              | -9.5             |
|  | 0 | -          | 5.75  | B3LYP/6-31G(d,p) | -2.6             | -1.7             | -16.4            | 10.7             | -11.7            |
|  | 0 | -x, -y, -z | 11.39 | B3LYP/6-31G(d,p) | -4.7             | -0.4             | -5.9             | 7.7              | -5.7             |
|  | 0 | -          | 6.93  | B3LYP/6-31G(d,p) | 12.5             | -8.0             | -64.3            | 25.5             | -32.9            |
|  | 0 | -          | 10.87 | B3LYP/6-31G(d,p) | -6.9             | -1.9             | -4.4             | 8.9              | -7.1             |
|  | 1 | -          | 5.28  | B3LYP/6-31G(d,p) | -6.9             | -1.9             | -4.4             | 8.9              | -7.1             |
|  | 1 | -          | 10.87 | B3LYP/6-31G(d,p) | -6.9             | -1.9             | -4.4             | 8.9              | -7.1             |

|   |            |       |                  |       |       |       |      |       |
|---|------------|-------|------------------|-------|-------|-------|------|-------|
| 2 | x, y, z    | 8.87  | B3LYP/6-31G(d,p) | 0.6   | -0.3  | -2.0  | 0.1  | -1.3  |
| 1 | -          | 5.69  | B3LYP/6-31G(d,p) | -7.4  | -4.1  | -24.3 | 12.4 | -24.4 |
| 1 | -x, -y, -z | 4.32  | B3LYP/6-31G(d,p) | -9.6  | -2.5  | -32.3 | 15.9 | -30.3 |
| 1 | -          | 7.50  | B3LYP/6-31G(d,p) | -2.6  | -1.1  | -10.0 | 3.0  | -10.4 |
| 1 | -          | 4.60  | B3LYP/6-31G(d,p) | -2.6  | -1.1  | -10.0 | 3.0  | -10.4 |
| 1 | -          | 9.17  | B3LYP/6-31G(d,p) | -2.0  | -1.2  | -8.8  | 5.0  | -7.6  |
| 1 | -x, -y, -z | 9.17  | B3LYP/6-31G(d,p) | -11.7 | -4.2  | -8.9  | 10.2 | -16.9 |
| 1 | -          | 10.57 | B3LYP/6-31G(d,p) | -61.7 | -16.7 | -9.5  | 58.4 | -49.8 |
| 1 | -          | 9.30  | B3LYP/6-31G(d,p) | -0.1  | -0.5  | -5.8  | 2.3  | -4.2  |
| 1 | -          | 4.76  | B3LYP/6-31G(d,p) | -0.1  | -0.5  | -5.8  | 2.3  | -4.2  |
| 1 | -          | 6.15  | B3LYP/6-31G(d,p) | -6.7  | -0.6  | -0.9  | 0.0  | -8.2  |
| 1 | -          | 5.75  | B3LYP/6-31G(d,p) | -2.6  | -1.7  | -16.4 | 10.7 | -11.7 |
| 1 | -          | 4.73  | B3LYP/6-31G(d,p) | -7.3  | -2.2  | -27.2 | 15.0 | -23.7 |

**Table S16. Overall Energy Profile for Co-crystal 6b.**

|  | N | Symop            | R     | Electron Density | E <sub>ele</sub> | E <sub>pol</sub> | E <sub>dis</sub> | E <sub>rep</sub> | E <sub>tot</sub> |
|--|---|------------------|-------|------------------|------------------|------------------|------------------|------------------|------------------|
|  | 0 | -                | 7.62  | B3LYP/6-31G(d,p) | -2.5             | -0.5             | -16.6            | 10.8             | -10.7            |
|  | 0 | -                | 8.04  | B3LYP/6-31G(d,p) | -2.0             | -1.3             | -12.1            | 7.0              | -9.3             |
|  | 0 | x, y, z          | 3.80  | B3LYP/6-31G(d,p) | -1.4             | -0.8             | -52.1            | 31.1             | -28.3            |
|  | 0 | -                | 9.05  | B3LYP/6-31G(d,p) | -1.4             | -1.4             | -4.8             | 2.2              | -5.4             |
|  | 0 | -                | 6.98  | B3LYP/6-31G(d,p) | -7.7             | -1.5             | -21.8            | 21.6             | -14.8            |
|  | 0 | -                | 8.84  | B3LYP/6-31G(d,p) | -55.6            | -13.1            | -15.8            | 65.2             | -42.0            |
|  | 0 | -                | 10.27 | B3LYP/6-31G(d,p) | -7.2             | -2.4             | -4.4             | 6.9              | -9.0             |
|  | 2 | x, y, z          | 3.80  | B3LYP/6-31G(d,p) | 1.8              | -1.7             | -46.3            | 27.7             | -22.6            |
|  | 1 | -                | 7.62  | B3LYP/6-31G(d,p) | -2.5             | -0.5             | -16.6            | 10.8             | -10.7            |
|  | 2 | x, -y+1/2, z+1/2 | 8.93  | B3LYP/6-31G(d,p) | -3.5             | -0.8             | -6.2             | 1.8              | -8.5             |
|  | 1 | -                | 6.98  | B3LYP/6-31G(d,p) | -7.7             | -1.5             | -21.8            | 21.6             | -14.8            |
|  | 2 | x, -y+1/2, z+1/2 | 7.83  | B3LYP/6-31G(d,p) | -1.9             | -0.7             | -9.5             | 4.6              | -7.9             |
|  | 1 | -                | 8.84  | B3LYP/6-31G(d,p) | -55.6            | -13.1            | -15.8            | 65.2             | -42.0            |
|  | 1 | -x, -y, -z       | 8.71  | B3LYP/6-31G(d,p) | -12.6            | -2.3             | -8.5             | 4.8              | -19.5            |
|  | 1 | -                | 9.05  | B3LYP/6-31G(d,p) | -1.4             | -1.4             | -4.8             | 2.2              | -5.4             |

|  |   |            |       |                  |      |      |       |     |      |
|--|---|------------|-------|------------------|------|------|-------|-----|------|
|  | 1 | -          | 8.04  | B3LYP/6-31G(d,p) | -2.0 | -1.3 | -12.1 | 7.0 | -9.3 |
|  | 1 | -x, -y, -z | 10.02 | B3LYP/6-31G(d,p) | -6.2 | -0.7 | -2.3  | 0.1 | -9.0 |
|  | 1 | -          | 10.27 | B3LYP/6-31G(d,p) | -7.2 | -2.4 | -4.4  | 6.9 | -9.0 |

**Table S17. Overall Energy Profile for Co-crystal 7.**

|  | N | Symop             | R     | Electron Density | E <sub>ele</sub> | E <sub>pol</sub> | E <sub>dis</sub> | E <sub>rep</sub> | E <sub>tot</sub> |
|--|---|-------------------|-------|------------------|------------------|------------------|------------------|------------------|------------------|
|  | 0 | -                 | 6.34  | B3LYP/6-31G(d,p) | 0.3              | -1.1             | -12.9            | 4.8              | -8.8             |
|  | 0 | -                 | 10.56 | B3LYP/6-31G(d,p) | -4.7             | -1.6             | -5.6             | 6.8              | -6.8             |
|  | 0 | -                 | 3.90  | B3LYP/6-31G(d,p) | -2.3             | -2.5             | -52.6            | 25.1             | -34.6            |
|  | 0 | -                 | 5.41  | B3LYP/6-31G(d,p) | -2.1             | -1.5             | -24.1            | 11.6             | -17.2            |
|  | 0 | -x, y+1/2, -z+1/2 | 10.50 | B3LYP/6-31G(d,p) | -3.7             | -0.8             | -8.9             | 6.4              | -8.3             |
|  | 0 | -                 | 10.69 | B3LYP/6-31G(d,p) | -59.6            | -15.7            | -9.1             | 64.3             | -42.9            |
|  | 0 | -                 | 9.85  | B3LYP/6-31G(d,p) | -3.8             | -1.5             | -5.1             | 1.8              | -8.4             |
|  | 1 | -                 | 5.41  | B3LYP/6-31G(d,p) | -2.1             | -1.5             | -24.1            | 11.6             | -17.2            |
|  | 1 | -x, -y, -z        | 5.94  | B3LYP/6-31G(d,p) | -9.3             | -0.5             | -13.8            | 9.3              | -16.5            |
|  | 2 | x, -y+1/2, z+1/2  | 10.00 | B3LYP/6-31G(d,p) | -33.2            | -7.9             | -5.1             | 26.1             | -29.2            |
|  | 1 | -                 | 10.69 | B3LYP/6-31G(d,p) | -59.5            | -15.7            | -9.1             | 64.3             | -42.8            |
|  | 1 | -                 | 3.90  | B3LYP/6-31G(d,p) | -2.3             | -2.5             | -52.6            | 25.1             | -34.5            |
|  | 1 | -x, -y, -z        | 3.72  | B3LYP/6-31G(d,p) | -15.9            | -1.6             | -36.7            | 18.3             | -38.7            |
|  | 2 | -x, y+1/2, -z+1/2 | 9.63  | B3LYP/6-31G(d,p) | -2.2             | -1.6             | -3.2             | 1.3              | -5.6             |
|  | 1 | -                 | 9.85  | B3LYP/6-31G(d,p) | -3.8             | -1.5             | -5.1             | 1.8              | -8.4             |
|  | 1 | -x, -y, -z        | 6.28  | B3LYP/6-31G(d,p) | -4.1             | -0.7             | -11.9            | 5.1              | -12.1            |
|  | 1 | -                 | 10.56 | B3LYP/6-31G(d,p) | -4.7             | -1.6             | -5.6             | 6.8              | -6.8             |
|  | 1 | -                 | 6.34  | B3LYP/6-31G(d,p) | 0.3              | -1.1             | -12.9            | 4.8              | -8.8             |

**Table S18. Overall Energy Profile for Co-crystal 7a.**

|  | N | Symop   | R     | Electron Density | E <sub>ele</sub> | E <sub>pol</sub> | E <sub>dis</sub> | E <sub>rep</sub> | E <sub>tot</sub> |
|--|---|---------|-------|------------------|------------------|------------------|------------------|------------------|------------------|
|  | 0 | x, y, z | 3.87  | B3LYP/6-31G(d,p) | 1.3              | -1.2             | -47.9            | 21.8             | -27.7            |
|  | 0 | -       | 8.09  | B3LYP/6-31G(d,p) | 0.0              | -0.7             | 0.0              | 0.0              | -0.7             |
|  | 0 | -       | 7.59  | B3LYP/6-31G(d,p) | 0.0              | 0.0              | 0.0              | 0.0              | 0.0              |
|  | 0 | -       | 6.79  | B3LYP/6-31G(d,p) | 0.6              | -0.0             | -0.2             | 0.0              | 0.4              |
|  | 0 | -       | 11.70 | B3LYP/6-31G(d,p) | -0.2             | -0.0             | -0.1             | 0.0              | -0.3             |

|   |            |       |                  |      |      |       |      |       |
|---|------------|-------|------------------|------|------|-------|------|-------|
| 0 | -          | 7.13  | B3LYP/6-31G(d,p) | 1.3  | -1.2 | -47.9 | 21.8 | -27.7 |
| 0 | -          | 7.38  | B3LYP/6-31G(d,p) | 0.0  | 0.00 | 0.0   | 0.0  | 0.0   |
| 0 | -          | 8.04  | B3LYP/6-31G(d,p) | 0.0  | -1.3 | 0.0   | 0.0  | -1.3  |
| 1 | -x, -y, -z | 9.19  | B3LYP/6-31G(d,p) | -0.2 | -0.0 | -0.1  | 0.0  | -0.3  |
| 2 | x, y, z    | 3.87  | B3LYP/6-31G(d,p) | 1.3  | -1.2 | -47.9 | 21.8 | -27.7 |
| 1 | -          | 7.59  | B3LYP/6-31G(d,p) | 0.0  | 0.0  | 0.0   | 0.0  | 0.0   |
| 1 | -          | 8.09  | B3LYP/6-31G(d,p) | 0.0  | 0.0  | 0.0   | 0.0  | 0.0   |
| 1 | -          | 6.79  | B3LYP/6-31G(d,p) | 0.6  | -0.0 | -0.2  | 0.0  | 0.4   |
| 1 | -x, -y, -z | 7.84  | B3LYP/6-31G(d,p) | 0.2  | -0.0 | -0.1  | 0.0  | 0.2   |
| 1 | -x, -y, -z | 8.54  | B3LYP/6-31G(d,p) | -0.2 | -0.0 | -0.0  | 0.0  | -0.2  |
| 1 | -          | 5.72  | B3LYP/6-31G(d,p) | 0.6  | -0.0 | -0.2  | 0.0  | 0.4   |
| 1 | -          | 4.58  | B3LYP/6-31G(d,p) | -0.2 | -0.0 | -0.1  | 0.0  | -0.3  |
| 1 | -          | 7.13  | B3LYP/6-31G(d,p) | 1.3  | -1.2 | -47.9 | 21.8 | -27.7 |
| 1 | -          | 11.70 | B3LYP/6-31G(d,p) | -0.2 | -0.0 | -0.1  | 0.0  | -0.3  |
| 1 | -          | 7.59  | B3LYP/6-31G(d,p) | 0.2  | -0.0 | -0.1  | 0.0  | 0.2   |
| 1 | -x, -y, -z | 8.57  | B3LYP/6-31G(d,p) | 0.1  | -0.0 | -0.0  | 0.0  | 0.1   |
| 1 | -          | 5.71  | B3LYP/6-31G(d,p) | 0.2  | -0.0 | -0.1  | 0.0  | 0.2   |

**Table S19. Overall Energy Profile for Co-crystal 7b.**

|  | N | Symop               | R     | Electron Density | E <sub>ele</sub> | E <sub>pol</sub> | E <sub>dis</sub> | E <sub>rep</sub> | E <sub>tot</sub> |
|--|---|---------------------|-------|------------------|------------------|------------------|------------------|------------------|------------------|
|  | 0 | -                   | 7.62  | B3LYP/6-31G(d,p) | -1.5             | -0.6             | -16.8            | 10.7             | -10.0            |
|  | 0 | -                   | 8.04  | B3LYP/6-31G(d,p) | -2.2             | -1.4             | -12.1            | 7.0              | -9.6             |
|  | 0 | x, y, z             | 3.80  | B3LYP/6-31G(d,p) | 0.2              | -1.4             | -54.7            | 35.1             | -26.8            |
|  | 0 | -                   | 9.05  | B3LYP/6-31G(d,p) | -1.5             | -1.5             | -4.8             | 2.2              | -5.6             |
|  | 0 | -                   | 6.98  | B3LYP/6-31G(d,p) | -6.9             | -1.7             | -22.3            | 22.5             | -14.1            |
|  | 0 | -                   | 8.84  | B3LYP/6-31G(d,p) | -56.6            | -13.7            | -15.8            | 64.8             | -43.7            |
|  | 0 | -                   | 10.27 | B3LYP/6-31G(d,p) | -7.4             | -2.4             | -4.4             | 7.1              | -9.1             |
|  | 2 | x, y, z             | 3.80  | B3LYP/6-31G(d,p) | 1.7              | -1.8             | -46.5            | 28.1             | -22.7            |
|  | 1 | -                   | 7.62  | B3LYP/6-31G(d,p) | -1.5             | -0.6             | -16.8            | 10.7             | -10.0            |
|  | 2 | x, -y+1/2,<br>z+1/2 | 8.93  | B3LYP/6-31G(d,p) | -3.4             | -0.8             | -6.1             | 1.8              | -8.4             |
|  | 1 | -                   | 6.98  | B3LYP/6-31G(d,p) | -6.9             | -1.7             | -22.3            | 22.5             | -14.1            |

|   |                     |       |                  |       |       |       |      |       |
|---|---------------------|-------|------------------|-------|-------|-------|------|-------|
| 2 | x, -y+1/2,<br>z+1/2 | 7.83  | B3LYP/6-31G(d,p) | -1.9  | -0.7  | -9.5  | 4.8  | -7.9  |
| 1 | -                   | 8.84  | B3LYP/6-31G(d,p) | -56.6 | -13.7 | -15.8 | 64.8 | -43.7 |
| 1 | -x, -y, -z          | 8.71  | B3LYP/6-31G(d,p) | -12.6 | -2.3  | -8.5  | 4.7  | -19.5 |
| 1 | -                   | 9.05  | B3LYP/6-31G(d,p) | -1.5  | -1.5  | -4.8  | 2.2  | -5.6  |
| 1 | -                   | 8.04  | B3LYP/6-31G(d,p) | -2.2  | -1.4  | -12.1 | 7.0  | -9.6  |
| 1 | -x, -y, -z          | 10.02 | B3LYP/6-31G(d,p) | -6.1  | -0.7  | -2.3  | 0.1  | -8.9  |
| 1 | -                   | 10.27 | B3LYP/6-31G(d,p) | -7.4  | -2.4  | -4.4  | 7.1  | -9.1  |
